# Supplementary material
Source: publisher figshare collection journal article supplement (https://acs.figshare.com/ndownloader/files/4166017)
Supplement: Supplementary file 1 [file 4166017]

 
data_joa333s 
 
_audit_creation_method            SHELXL-97 
_chemical_name_systematic 
; 
 ? 
; 
_chemical_name_common             ? 
_chemical_melting_point           ? 
_chemical_formula_moiety          ? 
_chemical_formula_sum 
 'C15 H18 F3 N3 O6 Pd S' 
_chemical_formula_weight          531.78 
 
loop_ 
 _atom_type_symbol 
 _atom_type_description 
 _atom_type_scat_dispersion_real 
 _atom_type_scat_dispersion_imag 
 _atom_type_scat_source 
 'C'  'C'   0.0033   0.0016 
 'International Tables Vol C Tables 4.2.6.8 and 6.1.1.4' 
 'H'  'H'   0.0000   0.0000 
 'International Tables Vol C Tables 4.2.6.8 and 6.1.1.4' 
 'N'  'N'   0.0061   0.0033 
 'International Tables Vol C Tables 4.2.6.8 and 6.1.1.4' 
 'F'  'F'   0.0171   0.0103 
 'International Tables Vol C Tables 4.2.6.8 and 6.1.1.4' 
 'S'  'S'   0.1246   0.1234 
 'International Tables Vol C Tables 4.2.6.8 and 6.1.1.4' 
 'Pd'  'Pd'  -0.9988   1.0072 
 'International Tables Vol C Tables 4.2.6.8 and 6.1.1.4' 
 'O'  'O'   0.0106   0.0060 
 'International Tables Vol C Tables 4.2.6.8 and 6.1.1.4' 
 
_symmetry_cell_setting            monoclinic 
_symmetry_space_group_name_H-M    'P 2(1)/n' 
 
loop_ 
 _symmetry_equiv_pos_as_xyz 
 'x, y, z' 
 '-x+1/2, y+1/2, -z+1/2' 
 '-x, -y, -z' 
 'x-1/2, -y-1/2, z-1/2' 
 
_cell_length_a                    7.2906(4) 
_cell_length_b                    16.5411(9) 
_cell_length_c                    17.4266(15) 
_cell_angle_alpha                 90.00 
_cell_angle_beta                  98.898(2) 
_cell_angle_gamma                 90.00 
_cell_volume                      2076.3(2) 
_cell_formula_units_Z             4 
_cell_measurement_temperature     100(2) 
_cell_measurement_reflns_used     3882 
_cell_measurement_theta_min       2.37 
_cell_measurement_theta_max       25.48 
 
_exptl_crystal_description        lath 
_exptl_crystal_colour             colourless 
_exptl_crystal_size_max           0.15 
_exptl_crystal_size_mid           0.09 
_exptl_crystal_size_min           0.04 
_exptl_crystal_density_meas       ? 
_exptl_crystal_density_diffrn     1.701 
_exptl_crystal_density_method     'not measured' 
_exptl_crystal_F_000              1064 
_exptl_absorpt_coefficient_mu     1.057 
_exptl_absorpt_correction_type    multi-scan 
_exptl_absorpt_correction_T_min   0.7885
_exptl_absorpt_correction_T_max   0.9590 
_exptl_absorpt_process_details    SADABS 
 
_exptl_special_details 
; 
 ? 
; 
 
_diffrn_ambient_temperature       100(2) 
_diffrn_radiation_wavelength      0.71073 
_diffrn_radiation_type            MoK\a 
_diffrn_radiation_source          'fine-focus sealed tube' 
_diffrn_radiation_monochromator   graphite 
_diffrn_measurement_device_type   'Bruker SMART APEC CCD' 
_diffrn_measurement_method        \w-scan
_diffrn_detector_area_resol_mean  8.26 
_diffrn_standards_number          ? 
_diffrn_standards_interval_count  ? 
_diffrn_standards_interval_time   ? 
_diffrn_standards_decay_%         ? 
_diffrn_reflns_number             23593 
_diffrn_reflns_av_R_equivalents   0.0606 
_diffrn_reflns_av_sigmaI/netI     0.0526 
_diffrn_reflns_limit_h_min        -9 
_diffrn_reflns_limit_h_max        9 
_diffrn_reflns_limit_k_min        -21 
_diffrn_reflns_limit_k_max        21 
_diffrn_reflns_limit_l_min        -23 
_diffrn_reflns_limit_l_max        22 
_diffrn_reflns_theta_min          2.37 
_diffrn_reflns_theta_max          28.16 
_reflns_number_total              4837 
_reflns_number_gt                 4067 
_reflns_threshold_expression      >2sigma(I) 
 
_computing_data_collection        'Bruker SMART' 
_computing_cell_refinement        'Bruker SAINT' 
_computing_data_reduction         'Bruker SAINT'  
_computing_structure_solution     'SHELXS-97 (Sheldrick, 1990)' 
_computing_structure_refinement   'SHELXL-97 (Sheldrick, 1997)' 
_computing_molecular_graphics     'Bruker SHELXTL'  
_computing_publication_material   'Bruker SHELXTL'   
 
_refine_special_details 
; 
 Refinement of F^2^ against ALL reflections.  The weighted R-factor wR and 
 goodness of fit S are based on F^2^, conventional R-factors R are based 
 on F, with F set to zero for negative F^2^. The threshold expression of 
 F^2^ > 2sigma(F^2^) is used only for calculating R-factors(gt) etc. and is 
 not relevant to the choice of reflections for refinement.  R-factors based 
 on F^2^ are statistically about twice as large as those based on F, and R- 
 factors based on ALL data will be even larger. 

C10 is disordered over two positions, ca 53:47%)

; 
 
_refine_ls_structure_factor_coef  Fsqd  
_refine_ls_matrix_type            full 
_refine_ls_weighting_scheme       calc  
_refine_ls_weighting_details 
 'calc w=1/[\s^2^(Fo^2^)+(0.0386P)^2^+5.7623P] where P=(Fo^2^+2Fc^2^)/3' 
_atom_sites_solution_primary      direct 
_atom_sites_solution_secondary    difmap 
_atom_sites_solution_hydrogens    geom 
_refine_ls_hydrogen_treatment     
'OH and NH2(with SADI) free, oredered methyls rigid, others riding'
_refine_ls_extinction_method      none 
_refine_ls_extinction_coef        ? 
_refine_ls_number_reflns          4837 
_refine_ls_number_parameters      276 
_refine_ls_number_restraints      7 
_refine_ls_R_factor_all           0.0713 
_refine_ls_R_factor_gt            0.0556 
_refine_ls_wR_factor_ref          0.1122 
_refine_ls_wR_factor_gt           0.1066 
_refine_ls_goodness_of_fit_ref    1.129 
_refine_ls_restrained_S_all       1.128 
_refine_ls_shift/su_max           0.000 
_refine_ls_shift/su_mean          0.000 
 
loop_ 
 _atom_site_label 
 _atom_site_type_symbol 
 _atom_site_fract_x 
 _atom_site_fract_y 
 _atom_site_fract_z 
 _atom_site_U_iso_or_equiv 
 _atom_site_adp_type 
 _atom_site_occupancy 
 _atom_site_symmetry_multiplicity 
 _atom_site_calc_flag 
 _atom_site_refinement_flags 
 _atom_site_disorder_assembly 
 _atom_site_disorder_group 
Pd1 Pd 0.78569(5) 0.44711(2) -0.004738(18) 0.01515(10) Uani 1 1 d . . . 
N1 N 0.8996(6) 0.3989(2) -0.0946(2) 0.0208(8) Uani 1 1 d D . . 
H1B H 0.883(6) 0.434(2) -0.128(2) 0.009(11) Uiso 1 1 d D . . 
H1A H 1.010(5) 0.401(3) -0.077(3) 0.022(14) Uiso 1 1 d D . . 
N2 N 0.6985(5) 0.4969(2) 0.0883(2) 0.0190(8) Uani 1 1 d . . . 
N3 N 0.7252(5) 0.5594(2) -0.0647(2) 0.0225(8) Uani 1 1 d . . . 
C1 C 0.8343(6) 0.3424(3) 0.0496(2) 0.0165(9) Uani 1 1 d . . . 
C2 C 0.7970(6) 0.2703(3) 0.0068(2) 0.0196(9) Uani 1 1 d . . . 
C3 C 0.8381(7) 0.1968(3) 0.0440(3) 0.0228(10) Uani 1 1 d . . . 
H3 H 0.8143 0.1481 0.0153 0.027 Uiso 1 1 calc R . . 
C4 C 0.9132(7) 0.1926(3) 0.1223(3) 0.0258(10) Uani 1 1 d . . . 
H4 H 0.9398 0.1418 0.1469 0.031 Uiso 1 1 calc R . . 
C5 C 0.9485(6) 0.2639(3) 0.1638(2) 0.0207(9) Uani 1 1 d . . . 
O1 O 1.0272(5) 0.2573(2) 0.24038(19) 0.0293(8) Uani 1 1 d . . . 
H01 H 1.043(8) 0.301(4) 0.260(3) 0.033(16) Uiso 1 1 d . . . 
C6 C 0.9075(6) 0.3380(3) 0.1283(2) 0.0176(9) Uani 1 1 d . . . 
H6 H 0.9294 0.3863 0.1578 0.021 Uiso 1 1 calc R . . 
C7 C 0.7226(6) 0.2733(3) -0.0786(3) 0.0214(10) Uani 1 1 d . . . 
H7A H 0.6025 0.3024 -0.0866 0.026 Uiso 1 1 calc R . . 
H7B H 0.7002 0.2176 -0.0986 0.026 Uiso 1 1 calc R . . 
C8 C 0.8578(6) 0.3158(3) -0.1237(2) 0.0209(10) Uani 1 1 d . . . 
H8 H 0.8008 0.3187 -0.1797 0.025 Uiso 1 1 calc R . . 
O2 O 1.1874(5) 0.2977(2) -0.0888(2) 0.0343(9) Uani 1 1 d . . . 
O3 O 1.0152(5) 0.1972(2) -0.1477(3) 0.0519(12) Uani 1 1 d . . . 
C9 C 1.0394(7) 0.2703(3) -0.1176(3) 0.0274(11) Uani 1 1 d . A . 
C10 C 1.1846(16) 0.1443(8) -0.1255(13) 0.039(4) Uiso 0.53(4) 1 d P A 1 
H10A H 1.1611 0.0907 -0.1490 0.047 Uiso 0.53(4) 1 calc PR A 1 
H10B H 1.2109 0.1390 -0.0689 0.047 Uiso 0.53(4) 1 calc PR A 1 
H10C H 1.2915 0.1689 -0.1443 0.047 Uiso 0.53(4) 1 calc PR A 1 
C10' C 1.1739(18) 0.1517(8) -0.1601(14) 0.037(4) Uiso 0.47(4) 1 d P A 2 
H10D H 1.1340 0.0991 -0.1829 0.044 Uiso 0.47(4) 1 calc PR A 2 
H10E H 1.2551 0.1433 -0.1105 0.044 Uiso 0.47(4) 1 calc PR A 2 
H10F H 1.2417 0.1812 -0.1957 0.044 Uiso 0.47(4) 1 calc PR A 2 
C11 C 0.6788(7) 0.6202(3) -0.0882(3) 0.0277(11) Uani 1 1 d . . . 
C12 C 0.6194(8) 0.7002(4) -0.1172(4) 0.0519(18) Uani 1 1 d . . . 
H12A H 0.4951 0.7115 -0.1050 0.078 Uiso 1 1 calc R . . 
H12B H 0.6163 0.7019 -0.1736 0.078 Uiso 1 1 calc R . . 
H12C H 0.7067 0.7409 -0.0924 0.078 Uiso 1 1 calc R . . 
C13 C 0.6650(6) 0.5321(3) 0.1401(3) 0.0209(10) Uani 1 1 d . . . 
C14 C 0.6239(8) 0.5763(3) 0.2071(3) 0.0309(12) Uani 1 1 d . . . 
H14A H 0.5123 0.5538 0.2239 0.046 Uiso 1 1 calc R . . 
H14B H 0.6028 0.6334 0.1934 0.046 Uiso 1 1 calc R . . 
H14C H 0.7289 0.5717 0.2494 0.046 Uiso 1 1 calc R . . 
C99 C 0.1035(9) 0.5350(3) 0.3895(3) 0.0421(15) Uani 1 1 d D . . 
F1 F -0.0795(6) 0.5321(3) 0.3886(2) 0.0652(12) Uani 1 1 d D . . 
F2 F 0.1841(7) 0.5017(3) 0.4535(2) 0.0750(13) Uani 1 1 d D . . 
F3 F 0.1517(8) 0.6111(2) 0.3883(3) 0.0885(16) Uani 1 1 d D . . 
S1 S 0.16312(17) 0.48259(7) 0.30347(7) 0.0246(3) Uani 1 1 d . . . 
O4 O 0.0946(6) 0.4023(2) 0.3138(2) 0.0372(9) Uani 1 1 d . . . 
O5 O 0.3603(6) 0.4903(3) 0.3124(3) 0.0593(13) Uani 1 1 d . . . 
O6 O 0.0630(6) 0.5264(3) 0.2404(2) 0.0487(11) Uani 1 1 d . . . 
 
loop_ 
 _atom_site_aniso_label 
 _atom_site_aniso_U_11 
 _atom_site_aniso_U_22 
 _atom_site_aniso_U_33 
 _atom_site_aniso_U_23 
 _atom_site_aniso_U_13 
 _atom_site_aniso_U_12 
Pd1 0.01708(17) 0.01519(16) 0.01326(16) 0.00082(14) 0.00258(11) -0.00213(14) 
N1 0.027(2) 0.018(2) 0.019(2) 0.0007(16) 0.0079(17) -0.0021(17) 
N2 0.022(2) 0.0145(18) 0.0203(19) 0.0018(15) 0.0041(15) -0.0005(15) 
N3 0.022(2) 0.023(2) 0.0224(19) 0.0044(17) 0.0019(15) -0.0020(17) 
C1 0.017(2) 0.018(2) 0.017(2) 0.0010(17) 0.0078(16) -0.0021(17) 
C2 0.023(2) 0.021(2) 0.016(2) 0.0014(17) 0.0073(18) -0.0030(19) 
C3 0.035(3) 0.015(2) 0.020(2) -0.0044(18) 0.0077(19) -0.0065(19) 
C4 0.039(3) 0.017(2) 0.022(2) 0.0046(19) 0.007(2) 0.000(2) 
C5 0.027(2) 0.021(2) 0.015(2) 0.0026(18) 0.0058(18) -0.0021(19) 
O1 0.049(2) 0.0208(18) 0.0159(16) 0.0027(14) -0.0019(15) -0.0013(16) 
C6 0.022(2) 0.014(2) 0.018(2) -0.0022(17) 0.0059(17) -0.0026(17) 
C7 0.025(2) 0.019(2) 0.021(2) 0.0003(18) 0.0025(18) -0.0043(18) 
C8 0.030(3) 0.020(2) 0.013(2) -0.0029(17) 0.0045(18) -0.0038(19) 
O2 0.027(2) 0.035(2) 0.041(2) -0.0025(17) 0.0061(16) -0.0057(16) 
O3 0.030(2) 0.028(2) 0.100(4) -0.024(2) 0.018(2) -0.0036(17) 
C9 0.030(3) 0.026(3) 0.029(3) -0.002(2) 0.009(2) -0.005(2) 
C11 0.017(2) 0.030(3) 0.038(3) 0.006(2) 0.010(2) -0.003(2) 
C12 0.037(3) 0.034(3) 0.088(5) 0.030(3) 0.020(3) 0.011(3) 
C13 0.018(2) 0.014(2) 0.030(3) 0.0045(19) 0.0051(19) -0.0003(17) 
C14 0.036(3) 0.029(3) 0.030(3) -0.004(2) 0.014(2) 0.007(2) 
C99 0.067(4) 0.027(3) 0.034(3) 0.002(2) 0.010(3) -0.004(3) 
F1 0.072(3) 0.074(3) 0.059(3) 0.001(2) 0.039(2) 0.016(2) 
F2 0.117(4) 0.078(3) 0.0243(19) -0.0053(19) -0.007(2) 0.006(3) 
F3 0.149(5) 0.033(2) 0.091(3) -0.027(2) 0.041(3) -0.019(3) 
S1 0.0299(7) 0.0222(6) 0.0235(6) 0.0037(5) 0.0099(5) -0.0006(5) 
O4 0.058(3) 0.0244(19) 0.030(2) -0.0014(16) 0.0078(18) -0.0119(18) 
O5 0.039(3) 0.056(3) 0.089(4) 0.009(3) 0.027(2) -0.002(2) 
O6 0.065(3) 0.051(3) 0.031(2) 0.0173(19) 0.009(2) 0.016(2) 
 
_geom_special_details 
; 
 All esds (except the esd in the dihedral angle between two l.s. planes) 
 are estimated using the full covariance matrix.  The cell esds are taken 
 into account individually in the estimation of esds in distances, angles 
 and torsion angles; correlations between esds in cell parameters are only 
 used when they are defined by crystal symmetry.  An approximate (isotropic) 
 treatment of cell esds is used for estimating esds involving l.s. planes. 
; 
 
loop_ 
 _geom_bond_atom_site_label_1 
 _geom_bond_atom_site_label_2 
 _geom_bond_distance 
 _geom_bond_site_symmetry_2 
 _geom_bond_publ_flag 
Pd1 C1 1.979(4) . ? 
Pd1 N2 2.008(4) . ? 
Pd1 N1 2.044(4) . ? 
Pd1 N3 2.143(4) . ? 
N1 C8 1.482(6) . ? 
N2 C13 1.131(6) . ? 
N3 C11 1.119(6) . ? 
C1 C6 1.395(6) . ? 
C1 C2 1.411(6) . ? 
C2 C3 1.388(6) . ? 
C2 C7 1.503(6) . ? 
C3 C4 1.391(6) . ? 
C4 C5 1.386(7) . ? 
C5 O1 1.373(5) . ? 
C5 C6 1.385(6) . ? 
C7 C8 1.525(6) . ? 
C8 C9 1.512(7) . ? 
O2 C9 1.206(6) . ? 
O3 C9 1.318(6) . ? 
O3 C10' 1.425(13) . ? 
O3 C10 1.515(13) . ? 
C11 C12 1.457(7) . ? 
C13 C14 1.449(6) . ? 
C99 F2 1.300(6) . ? 
C99 F3 1.308(6) . ? 
C99 F1 1.332(7) . ? 
C99 S1 1.841(6) . ? 
S1 O6 1.421(4) . ? 
S1 O5 1.428(4) . ? 
S1 O4 1.440(4) . ? 
 
loop_ 
 _geom_angle_atom_site_label_1 
 _geom_angle_atom_site_label_2 
 _geom_angle_atom_site_label_3 
 _geom_angle 
 _geom_angle_site_symmetry_1 
 _geom_angle_site_symmetry_3 
 _geom_angle_publ_flag 
C1 Pd1 N2 91.64(16) . . ? 
C1 Pd1 N1 87.77(16) . . ? 
N2 Pd1 N1 174.54(16) . . ? 
C1 Pd1 N3 178.39(16) . . ? 
N2 Pd1 N3 88.35(15) . . ? 
N1 Pd1 N3 92.39(15) . . ? 
C8 N1 Pd1 122.5(3) . . ? 
C13 N2 Pd1 171.6(4) . . ? 
C11 N3 Pd1 170.3(4) . . ? 
C6 C1 C2 119.3(4) . . ? 
C6 C1 Pd1 121.9(3) . . ? 
C2 C1 Pd1 118.8(3) . . ? 
C3 C2 C1 118.9(4) . . ? 
C3 C2 C7 120.7(4) . . ? 
C1 C2 C7 120.4(4) . . ? 
C2 C3 C4 121.8(4) . . ? 
C5 C4 C3 118.8(4) . . ? 
O1 C5 C6 122.2(4) . . ? 
O1 C5 C4 117.1(4) . . ? 
C6 C5 C4 120.7(4) . . ? 
C5 C6 C1 120.5(4) . . ? 
C2 C7 C8 111.2(4) . . ? 
N1 C8 C9 107.8(4) . . ? 
N1 C8 C7 111.5(4) . . ? 
C9 C8 C7 111.3(4) . . ? 
C9 O3 C10' 118.9(7) . . ? 
C9 O3 C10 112.0(6) . . ? 
C10' O3 C10 23.7(6) . . ? 
O2 C9 O3 124.5(5) . . ? 
O2 C9 C8 124.1(5) . . ? 
O3 C9 C8 111.5(4) . . ? 
N3 C11 C12 178.8(6) . . ? 
N2 C13 C14 179.1(5) . . ? 
F2 C99 F3 109.5(5) . . ? 
F2 C99 F1 108.3(5) . . ? 
F3 C99 F1 107.8(5) . . ? 
F2 C99 S1 111.5(4) . . ? 
F3 C99 S1 110.1(4) . . ? 
F1 C99 S1 109.6(4) . . ? 
O6 S1 O5 115.3(3) . . ? 
O6 S1 O4 114.8(3) . . ? 
O5 S1 O4 115.6(3) . . ? 
O6 S1 C99 103.4(3) . . ? 
O5 S1 C99 103.3(3) . . ? 
O4 S1 C99 101.7(2) . . ? 
 
loop_ 
 _geom_hbond_atom_site_label_D 
 _geom_hbond_atom_site_label_H 
 _geom_hbond_atom_site_label_A 
 _geom_hbond_distance_DH 
 _geom_hbond_distance_HA 
 _geom_hbond_distance_DA 
 _geom_hbond_angle_DHA 
 _geom_hbond_site_symmetry_A 
N1 H1B O6  0.82(3) 2.15(4) 2.875(5) 147(4) 3_665 
O1 H01 O4  0.80(6) 1.92(6) 2.726(5) 176(6) 1_655 
C14 H14A O5  0.98 2.29 3.190(7) 152.5 . 
 
_diffrn_measured_fraction_theta_max    0.949 
_diffrn_reflns_theta_full              26.00 
_diffrn_measured_fraction_theta_full   0.999 
_refine_diff_density_max    0.986 
_refine_diff_density_min   -1.349 
_refine_diff_density_rms    0.129 


#===END

 
data_ist323sq 
 
_audit_creation_method            SHELXL-97 
_chemical_name_systematic 
; 
 ? 
; 
_chemical_name_common             ? 
_chemical_melting_point           ? 
_chemical_formula_moiety          ? 
_chemical_formula_sum 
 'C30 H30 N O5 P Pd' 
_chemical_formula_weight          621.92 
 
loop_ 
 _atom_type_symbol 
 _atom_type_description 
 _atom_type_scat_dispersion_real 
 _atom_type_scat_dispersion_imag 
 _atom_type_scat_source 
 'C'  'C'   0.0033   0.0016 
 'International Tables Vol C Tables 4.2.6.8 and 6.1.1.4' 
 'H'  'H'   0.0000   0.0000 
 'International Tables Vol C Tables 4.2.6.8 and 6.1.1.4' 
 'N'  'N'   0.0061   0.0033 
 'International Tables Vol C Tables 4.2.6.8 and 6.1.1.4' 
 'O'  'O'   0.0106   0.0060 
 'International Tables Vol C Tables 4.2.6.8 and 6.1.1.4' 
 'P'  'P'   0.1023   0.0942 
 'International Tables Vol C Tables 4.2.6.8 and 6.1.1.4' 
 'Pd'  'Pd'  -0.9988   1.0072 
 'International Tables Vol C Tables 4.2.6.8 and 6.1.1.4' 
 
_symmetry_cell_setting            triclinic 
_symmetry_space_group_name_H-M    'P -1' 
 
loop_ 
 _symmetry_equiv_pos_as_xyz 
 'x, y, z' 
 '-x, -y, -z' 
 
_cell_length_a                    10.1867(5) 
_cell_length_b                    12.514(6) 
_cell_length_c                    13.6052(7) 
_cell_angle_alpha                 66.454(2) 
_cell_angle_beta                  79.382(2) 
_cell_angle_gamma                 77.703(2) 
_cell_volume                      1543.9(7) 
_cell_formula_units_Z             2 
_cell_measurement_temperature     100(2) 
_cell_measurement_reflns_used     7402 
_cell_measurement_theta_min       2.46  
_cell_measurement_theta_max       27.23 
 
_exptl_crystal_description        block  
_exptl_crystal_colour             pale-yellow   
_exptl_crystal_size_max           0.21 
_exptl_crystal_size_mid           0.15 
_exptl_crystal_size_min           0.10 
_exptl_crystal_density_meas       ? 
_exptl_crystal_density_diffrn     1.338 
_exptl_crystal_density_method     'not measured' 
_exptl_crystal_F_000              636 
_exptl_absorpt_coefficient_mu     0.689 
_exptl_absorpt_correction_type    multi-scan 
_exptl_absorpt_correction_T_min   0.8075 
_exptl_absorpt_correction_T_max   0.9343 
_exptl_absorpt_process_details    SADABS 
 
_exptl_special_details 
; 
 ? 
; 
 
_diffrn_ambient_temperature       100(2) 
_diffrn_radiation_wavelength      0.71073 
_diffrn_radiation_type            MoK\a 
_diffrn_radiation_source          'fine-focus sealed tube' 
_diffrn_radiation_monochromator   graphite 
_diffrn_measurement_device_type   'Bruker SMART APEX CCD'  
_diffrn_measurement_method        \w-scan 
_diffrn_detector_area_resol_mean  8.26 
_diffrn_standards_number          ? 
_diffrn_standards_interval_count  ? 
_diffrn_standards_interval_time   ? 
_diffrn_standards_decay_%         ? 
_diffrn_reflns_number             17799 
_diffrn_reflns_av_R_equivalents   0.0255 
_diffrn_reflns_av_sigmaI/netI     0.0361 
_diffrn_reflns_limit_h_min        -13 
_diffrn_reflns_limit_h_max        13 
_diffrn_reflns_limit_k_min        -16 
_diffrn_reflns_limit_k_max        16 
_diffrn_reflns_limit_l_min        -17 
_diffrn_reflns_limit_l_max        18 
_diffrn_reflns_theta_min          1.64 
_diffrn_reflns_theta_max          28.10 
_reflns_number_total              6909 
_reflns_number_gt                 6106 
_reflns_threshold_expression      >2sigma(I) 
 
_computing_data_collection        'Bruker SMART' 
_computing_cell_refinement        'Bruker SAINT' 
_computing_data_reduction         'Bruker SAINT' 
_computing_structure_solution     'SHELXS-97 (Sheldrick, 1990)' 
_computing_structure_refinement   'SHELXL-97 (Sheldrick, 1997)' 
_computing_molecular_graphics     'Bruker SHELXTL'  
_computing_publication_material   'Bruker SHELXTL'  
 
_refine_special_details 
; 
 Refinement of F^2^ against ALL reflections.  The weighted R-factor wR and 
 goodness of fit S are based on F^2^, conventional R-factors R are based 
 on F, with F set to zero for negative F^2^. The threshold expression of 
 F^2^ > 2sigma(F^2^) is used only for calculating R-factors(gt) etc. and is 
 not relevant to the choice of reflections for refinement.  R-factors based 
 on F^2^ are statistically about twice as large as those based on F, and R- 
 factors based on ALL data will be even larger. 


  

 There is a poorly-resolved region of residual elelctron density.
this could not be adequately modelled and so was

 "removed" using the program SQUEEZE, which is part of the PLATON system.

 The void volume per cell was 250 \%A^3^, with a void electron count per cell

 of 83. This additional solvent was NOT taken account of when calculating

 derived parameters such as the formula weight, because the nature of the

 solvent was uncertain.


The COOMe is disordered over two positions, 52:48%.

; 
 
_refine_ls_structure_factor_coef  Fsqd  
_refine_ls_matrix_type            full 
_refine_ls_weighting_scheme       calc  
_refine_ls_weighting_details 
 'calc w=1/[\s^2^(Fo^2^)+(0.0504P)^2^+0.9939P] where P=(Fo^2^+2Fc^2^)/3' 
_atom_sites_solution_primary      direct 
_atom_sites_solution_secondary    difmap 
_atom_sites_solution_hydrogens    geom 
_refine_ls_hydrogen_treatment     
'NH2  and OH free with DFIX, rigid methyls others riding'

_refine_ls_extinction_method      none 
_refine_ls_extinction_coef        ? 
_refine_ls_number_reflns          6909 
_refine_ls_number_parameters      353 
_refine_ls_number_restraints      4 
_refine_ls_R_factor_all           0.0437 
_refine_ls_R_factor_gt            0.0377 
_refine_ls_wR_factor_ref          0.0950 
_refine_ls_wR_factor_gt           0.0927 
_refine_ls_goodness_of_fit_ref    1.052 
_refine_ls_restrained_S_all       1.052 
_refine_ls_shift/su_max           0.001 
_refine_ls_shift/su_mean          0.000 
 
loop_ 
 _atom_site_label 
 _atom_site_type_symbol 
 _atom_site_fract_x 
 _atom_site_fract_y 
 _atom_site_fract_z 
 _atom_site_U_iso_or_equiv 
 _atom_site_adp_type 
 _atom_site_occupancy 
 _atom_site_symmetry_multiplicity 
 _atom_site_calc_flag 
 _atom_site_refinement_flags 
 _atom_site_disorder_assembly 
 _atom_site_disorder_group 
Pd1 Pd 0.678788(19) 0.444964(17) 0.784601(16) 0.02168(7) Uani 1 1 d . . . 
P1 P 0.79522(6) 0.26612(6) 0.86981(5) 0.02141(14) Uani 1 1 d . . . 
N1 N 0.5679(2) 0.6092(2) 0.6955(2) 0.0281(5) Uani 1 1 d D B . 
H01A H 0.621(3) 0.634(3) 0.6414(18) 0.030(9) Uiso 1 1 d D . . 
H01B H 0.559(4) 0.639(3) 0.741(2) 0.045(11) Uiso 1 1 d D . . 
O1 O 0.3407(2) 0.32422(19) 1.15158(17) 0.0311(4) Uani 1 1 d D . . 
H02 H 0.265(2) 0.346(3) 1.173(3) 0.050(12) Uiso 1 1 d D . . 
O4 O 0.84222(19) 0.51645(19) 0.67324(16) 0.0324(5) Uani 1 1 d . . . 
O5 O 0.9028(2) 0.5965(3) 0.7743(2) 0.0529(7) Uani 1 1 d . . . 
C1 C 0.5040(3) 0.4051(2) 0.8744(2) 0.0231(5) Uani 1 1 d . . . 
C2 C 0.3904(3) 0.4346(2) 0.8177(2) 0.0246(5) Uani 1 1 d . . . 
C3 C 0.2631(3) 0.4234(2) 0.8753(2) 0.0289(6) Uani 1 1 d . . . 
H3 H 0.1870 0.4425 0.8368 0.035 Uiso 1 1 calc R . . 
C4 C 0.2432(3) 0.3857(2) 0.9860(2) 0.0289(6) Uani 1 1 d . . . 
H4 H 0.1553 0.3773 1.0235 0.035 Uiso 1 1 calc R . . 
C5 C 0.3549(3) 0.3600(2) 1.0419(2) 0.0261(6) Uani 1 1 d . . . 
C6 C 0.4837(3) 0.3688(2) 0.9865(2) 0.0237(5) Uani 1 1 d . . . 
H6 H 0.5591 0.3497 1.0256 0.028 Uiso 1 1 calc R . . 
C7 C 0.4044(3) 0.4888(3) 0.6967(2) 0.0315(6) Uani 1 1 d . B . 
H7A H 0.3197 0.4911 0.6695 0.038 Uiso 1 1 calc R . . 
H7B H 0.4790 0.4419 0.6663 0.038 Uiso 1 1 calc R . . 
C8 C 0.4348(3) 0.6156(3) 0.6634(2) 0.0322(6) Uani 1 1 d . . . 
H8 H 0.3622 0.6625 0.6966 0.039 Uiso 1 1 calc R A 1 
O2 O 0.5384(6) 0.6722(8) 0.4789(5) 0.0404(17) Uiso 0.478(16) 1 d P B 1 
O3 O 0.3234(6) 0.6972(7) 0.5051(5) 0.0363(16) Uiso 0.478(16) 1 d P B 1 
C9 C 0.4411(8) 0.6696(7) 0.5393(6) 0.0212(19) Uiso 0.478(16) 1 d P B 1 
C10 C 0.3106(8) 0.7525(8) 0.3952(6) 0.0329(19) Uiso 0.478(16) 1 d P B 1 
H10A H 0.2148 0.7698 0.3841 0.040 Uiso 0.478(16) 1 calc PR B 1 
H10B H 0.3594 0.7003 0.3581 0.040 Uiso 0.478(16) 1 calc PR B 1 
H10C H 0.3485 0.8262 0.3660 0.040 Uiso 0.478(16) 1 calc PR B 1 
O2' O 0.5356(5) 0.7101(7) 0.4820(4) 0.0375(15) Uiso 0.522(16) 1 d P B 2 
O3' O 0.3064(5) 0.7283(5) 0.5211(4) 0.0256(13) Uiso 0.522(16) 1 d P B 2 
C9' C 0.4275(8) 0.6904(8) 0.5507(6) 0.030(2) Uiso 0.522(16) 1 d P B 2 
C10' C 0.2855(8) 0.7869(8) 0.4092(6) 0.040(2) Uiso 0.522(16) 1 d P B 2 
H10D H 0.1885 0.8122 0.4028 0.048 Uiso 0.522(16) 1 calc PR B 2 
H10E H 0.3217 0.7326 0.3717 0.048 Uiso 0.522(16) 1 calc PR B 2 
H10F H 0.3321 0.8560 0.3768 0.048 Uiso 0.522(16) 1 calc PR B 2 
C11 C 0.9181(3) 0.5723(3) 0.6922(3) 0.0334(7) Uani 1 1 d . . . 
C12 C 1.0343(3) 0.6110(4) 0.6081(3) 0.0484(9) Uani 1 1 d . . . 
H12A H 1.0000 0.6739 0.5433 0.073 Uiso 1 1 calc R . . 
H12B H 1.0838 0.5439 0.5899 0.073 Uiso 1 1 calc R . . 
H12C H 1.0951 0.6405 0.6360 0.073 Uiso 1 1 calc R . . 
C21 C 0.9744(3) 0.2515(2) 0.8170(2) 0.0254(6) Uani 1 1 d . . . 
C22 C 1.0097(3) 0.2863(3) 0.7059(2) 0.0349(7) Uani 1 1 d . . . 
H22 H 0.9411 0.3179 0.6586 0.042 Uiso 1 1 calc R . . 
C23 C 1.1443(3) 0.2751(3) 0.6640(3) 0.0419(8) Uani 1 1 d . . . 
H23 H 1.1678 0.2991 0.5883 0.050 Uiso 1 1 calc R . . 
C24 C 1.2449(3) 0.2287(3) 0.7328(3) 0.0368(7) Uani 1 1 d . . . 
H24 H 1.3373 0.2210 0.7041 0.044 Uiso 1 1 calc R . . 
C25 C 1.2108(3) 0.1941(3) 0.8418(3) 0.0321(6) Uani 1 1 d . . . 
H25 H 1.2797 0.1623 0.8887 0.038 Uiso 1 1 calc R . . 
C26 C 1.0764(3) 0.2053(2) 0.8844(2) 0.0266(6) Uani 1 1 d . . . 
H26 H 1.0539 0.1810 0.9603 0.032 Uiso 1 1 calc R . . 
C31 C 0.8043(2) 0.2279(2) 1.0129(2) 0.0224(5) Uani 1 1 d . . . 
C32 C 0.7824(3) 0.1188(3) 1.0912(2) 0.0291(6) Uani 1 1 d . . . 
H32 H 0.7565 0.0618 1.0719 0.035 Uiso 1 1 calc R . . 
C33 C 0.7985(3) 0.0933(3) 1.1977(2) 0.0366(7) Uani 1 1 d . . . 
H33 H 0.7819 0.0193 1.2516 0.044 Uiso 1 1 calc R . . 
C34 C 0.8388(3) 0.1754(3) 1.2259(2) 0.0364(7) Uani 1 1 d . . . 
H34 H 0.8505 0.1570 1.2988 0.044 Uiso 1 1 calc R . . 
C35 C 0.8619(3) 0.2841(3) 1.1483(2) 0.0326(6) Uani 1 1 d . . . 
H35 H 0.8906 0.3400 1.1674 0.039 Uiso 1 1 calc R . . 
C36 C 0.8427(3) 0.3106(3) 1.0422(2) 0.0283(6) Uani 1 1 d . . . 
H36 H 0.8560 0.3858 0.9890 0.034 Uiso 1 1 calc R . . 
C41 C 0.7423(3) 0.1387(2) 0.8629(2) 0.0222(5) Uani 1 1 d . . . 
C42 C 0.6057(3) 0.1336(2) 0.8692(2) 0.0287(6) Uani 1 1 d . . . 
H42 H 0.5395 0.1970 0.8762 0.034 Uiso 1 1 calc R . . 
C43 C 0.5657(3) 0.0362(3) 0.8652(3) 0.0330(6) Uani 1 1 d . . . 
H43 H 0.4722 0.0329 0.8707 0.040 Uiso 1 1 calc R . . 
C44 C 0.6600(3) -0.0554(3) 0.8534(2) 0.0321(6) Uani 1 1 d . . . 
H44 H 0.6320 -0.1212 0.8496 0.039 Uiso 1 1 calc R . . 
C45 C 0.7958(3) -0.0515(3) 0.8472(3) 0.0352(7) Uani 1 1 d . . . 
H45 H 0.8612 -0.1152 0.8399 0.042 Uiso 1 1 calc R . . 
C46 C 0.8372(3) 0.0450(3) 0.8517(2) 0.0311(6) Uani 1 1 d . . . 
H46 H 0.9309 0.0472 0.8469 0.037 Uiso 1 1 calc R . . 
 
loop_ 
 _atom_site_aniso_label 
 _atom_site_aniso_U_11 
 _atom_site_aniso_U_22 
 _atom_site_aniso_U_33 
 _atom_site_aniso_U_23 
 _atom_site_aniso_U_13 
 _atom_site_aniso_U_12 
Pd1 0.01714(11) 0.02465(12) 0.02141(11) -0.00527(8) -0.00537(7) -0.00339(7) 
P1 0.0159(3) 0.0261(3) 0.0217(3) -0.0081(3) -0.0044(2) -0.0021(3) 
N1 0.0232(12) 0.0300(13) 0.0277(13) -0.0047(11) -0.0064(10) -0.0061(10) 
O1 0.0266(11) 0.0379(11) 0.0308(11) -0.0164(9) 0.0036(9) -0.0079(9) 
O4 0.0235(10) 0.0455(12) 0.0257(10) -0.0081(9) -0.0028(8) -0.0104(9) 
O5 0.0306(12) 0.0870(19) 0.0614(17) -0.0484(15) 0.0109(11) -0.0233(12) 
C1 0.0170(12) 0.0200(12) 0.0334(14) -0.0112(11) -0.0053(10) -0.0006(10) 
C2 0.0232(13) 0.0206(12) 0.0312(14) -0.0086(11) -0.0092(11) -0.0028(10) 
C3 0.0228(14) 0.0242(13) 0.0420(17) -0.0121(12) -0.0099(12) -0.0036(11) 
C4 0.0194(13) 0.0286(14) 0.0415(17) -0.0155(13) -0.0021(12) -0.0059(11) 
C5 0.0239(13) 0.0224(13) 0.0344(15) -0.0128(11) -0.0012(11) -0.0060(10) 
C6 0.0198(12) 0.0197(12) 0.0322(14) -0.0097(11) -0.0070(11) -0.0009(10) 
C7 0.0265(14) 0.0335(15) 0.0317(15) -0.0043(12) -0.0118(12) -0.0076(12) 
C8 0.0265(15) 0.0347(16) 0.0304(15) -0.0052(12) -0.0071(12) -0.0051(12) 
C11 0.0202(14) 0.0381(16) 0.0348(16) -0.0075(13) -0.0031(12) -0.0023(12) 
C12 0.0308(17) 0.066(2) 0.0393(19) -0.0074(17) 0.0032(14) -0.0194(16) 
C21 0.0152(12) 0.0318(14) 0.0284(14) -0.0123(12) -0.0006(10) -0.0017(10) 
C22 0.0226(14) 0.0501(19) 0.0312(16) -0.0165(14) -0.0034(12) -0.0011(13) 
C23 0.0331(17) 0.053(2) 0.0344(17) -0.0163(15) 0.0052(13) -0.0044(15) 
C24 0.0206(14) 0.0389(17) 0.052(2) -0.0220(15) 0.0058(13) -0.0046(12) 
C25 0.0200(13) 0.0335(15) 0.0471(18) -0.0198(14) -0.0058(12) -0.0020(11) 
C26 0.0211(13) 0.0279(14) 0.0334(15) -0.0145(12) -0.0017(11) -0.0044(11) 
C31 0.0129(11) 0.0283(13) 0.0243(13) -0.0098(11) -0.0041(10) 0.0017(10) 
C32 0.0241(14) 0.0335(15) 0.0279(14) -0.0104(12) -0.0024(11) -0.0028(11) 
C33 0.0407(18) 0.0377(16) 0.0243(14) -0.0052(12) -0.0052(13) -0.0031(13) 
C34 0.0366(17) 0.0465(18) 0.0246(14) -0.0152(13) -0.0103(12) 0.0062(14) 
C35 0.0266(15) 0.0392(16) 0.0377(16) -0.0229(14) -0.0114(12) 0.0067(12) 
C36 0.0238(14) 0.0320(15) 0.0286(14) -0.0115(12) -0.0061(11) -0.0006(11) 
C41 0.0224(13) 0.0243(13) 0.0197(12) -0.0070(10) -0.0059(10) -0.0027(10) 
C42 0.0201(13) 0.0283(14) 0.0363(16) -0.0120(12) -0.0023(11) -0.0019(11) 
C43 0.0238(14) 0.0300(15) 0.0437(17) -0.0115(13) -0.0035(12) -0.0061(12) 
C44 0.0367(16) 0.0248(14) 0.0362(16) -0.0091(12) -0.0123(13) -0.0050(12) 
C45 0.0327(16) 0.0312(15) 0.0440(18) -0.0175(14) -0.0142(14) 0.0059(12) 
C46 0.0229(14) 0.0334(15) 0.0381(16) -0.0145(13) -0.0120(12) 0.0028(11) 
 
_geom_special_details 
; 
 All esds (except the esd in the dihedral angle between two l.s. planes) 
 are estimated using the full covariance matrix.  The cell esds are taken 
 into account individually in the estimation of esds in distances, angles 
 and torsion angles; correlations between esds in cell parameters are only 
 used when they are defined by crystal symmetry.  An approximate (isotropic) 
 treatment of cell esds is used for estimating esds involving l.s. planes. 
; 
 
loop_ 
 _geom_bond_atom_site_label_1 
 _geom_bond_atom_site_label_2 
 _geom_bond_distance 
 _geom_bond_site_symmetry_2 
 _geom_bond_publ_flag 
Pd1 C1 2.001(3) . ? 
Pd1 O4 2.119(2) . ? 
Pd1 N1 2.120(2) . ? 
Pd1 P1 2.2500(10) . ? 
P1 C31 1.825(3) . ? 
P1 C41 1.829(3) . ? 
P1 C21 1.833(3) . ? 
N1 C8 1.476(4) . ? 
O1 C5 1.365(3) . ? 
O4 C11 1.265(4) . ? 
O5 C11 1.245(4) . ? 
C1 C6 1.394(4) . ? 
C1 C2 1.411(4) . ? 
C2 C3 1.390(4) . ? 
C2 C7 1.501(4) . ? 
C3 C4 1.375(4) . ? 
C4 C5 1.394(4) . ? 
C5 C6 1.390(4) . ? 
C7 C8 1.551(4) . ? 
C8 C9' 1.448(8) . ? 
C8 C9 1.542(8) . ? 
O2 C9 1.163(9) . ? 
O3 C9 1.294(9) . ? 
O3 C10 1.392(9) . ? 
O2' C9' 1.303(9) . ? 
O3' C9' 1.301(8) . ? 
O3' C10' 1.435(8) . ? 
C11 C12 1.499(4) . ? 
C21 C26 1.388(4) . ? 
C21 C22 1.395(4) . ? 
C22 C23 1.385(4) . ? 
C23 C24 1.389(5) . ? 
C24 C25 1.367(5) . ? 
C25 C26 1.386(4) . ? 
C31 C32 1.389(4) . ? 
C31 C36 1.393(4) . ? 
C32 C33 1.387(4) . ? 
C33 C34 1.387(5) . ? 
C34 C35 1.385(5) . ? 
C35 C36 1.387(4) . ? 
C41 C42 1.392(4) . ? 
C41 C46 1.393(4) . ? 
C42 C43 1.388(4) . ? 
C43 C44 1.372(4) . ? 
C44 C45 1.380(4) . ? 
C45 C46 1.387(4) . ? 
 
loop_ 
 _geom_angle_atom_site_label_1 
 _geom_angle_atom_site_label_2 
 _geom_angle_atom_site_label_3 
 _geom_angle 
 _geom_angle_site_symmetry_1 
 _geom_angle_site_symmetry_3 
 _geom_angle_publ_flag 
C1 Pd1 O4 169.49(9) . . ? 
C1 Pd1 N1 86.83(10) . . ? 
O4 Pd1 N1 82.66(9) . . ? 
C1 Pd1 P1 93.73(8) . . ? 
O4 Pd1 P1 96.72(6) . . ? 
N1 Pd1 P1 175.86(7) . . ? 
C31 P1 C41 105.00(12) . . ? 
C31 P1 C21 101.98(12) . . ? 
C41 P1 C21 102.40(12) . . ? 
C31 P1 Pd1 115.30(9) . . ? 
C41 P1 Pd1 117.24(9) . . ? 
C21 P1 Pd1 113.05(9) . . ? 
C8 N1 Pd1 120.99(18) . . ? 
C11 O4 Pd1 122.73(19) . . ? 
C6 C1 C2 118.6(2) . . ? 
C6 C1 Pd1 124.49(19) . . ? 
C2 C1 Pd1 116.1(2) . . ? 
C3 C2 C1 119.1(3) . . ? 
C3 C2 C7 120.0(2) . . ? 
C1 C2 C7 120.7(2) . . ? 
C4 C3 C2 122.4(3) . . ? 
C3 C4 C5 118.5(3) . . ? 
O1 C5 C6 118.7(2) . . ? 
O1 C5 C4 121.0(2) . . ? 
C6 C5 C4 120.3(3) . . ? 
C5 C6 C1 121.1(2) . . ? 
C2 C7 C8 107.1(2) . . ? 
C9' C8 N1 110.5(4) . . ? 
C9' C8 C9 12.8(4) . . ? 
N1 C8 C9 109.4(3) . . ? 
C9' C8 C7 115.6(4) . . ? 
N1 C8 C7 109.1(2) . . ? 
C9 C8 C7 105.2(4) . . ? 
C9 O3 C10 120.4(6) . . ? 
O2 C9 O3 120.0(7) . . ? 
O2 C9 C8 126.0(6) . . ? 
O3 C9 C8 113.1(6) . . ? 
C9' O3' C10' 121.1(6) . . ? 
O3' C9' O2' 122.3(6) . . ? 
O3' C9' C8 115.5(6) . . ? 
O2' C9' C8 122.0(6) . . ? 
O5 C11 O4 124.8(3) . . ? 
O5 C11 C12 118.9(3) . . ? 
O4 C11 C12 116.2(3) . . ? 
C26 C21 C22 118.8(2) . . ? 
C26 C21 P1 122.0(2) . . ? 
C22 C21 P1 119.2(2) . . ? 
C23 C22 C21 120.3(3) . . ? 
C22 C23 C24 120.0(3) . . ? 
C25 C24 C23 119.8(3) . . ? 
C24 C25 C26 120.5(3) . . ? 
C25 C26 C21 120.5(3) . . ? 
C32 C31 C36 119.6(3) . . ? 
C32 C31 P1 122.8(2) . . ? 
C36 C31 P1 117.5(2) . . ? 
C33 C32 C31 119.7(3) . . ? 
C34 C33 C32 120.3(3) . . ? 
C35 C34 C33 120.4(3) . . ? 
C34 C35 C36 119.3(3) . . ? 
C35 C36 C31 120.7(3) . . ? 
C42 C41 C46 118.7(2) . . ? 
C42 C41 P1 120.4(2) . . ? 
C46 C41 P1 120.9(2) . . ? 
C43 C42 C41 120.3(3) . . ? 
C44 C43 C42 120.6(3) . . ? 
C43 C44 C45 119.7(3) . . ? 
C44 C45 C46 120.3(3) . . ? 
C45 C46 C41 120.4(3) . . ? 
 
loop_ 
 _geom_hbond_atom_site_label_D 
 _geom_hbond_atom_site_label_H 
 _geom_hbond_atom_site_label_A 
 _geom_hbond_distance_DH 
 _geom_hbond_distance_HA 
 _geom_hbond_distance_DA 
 _geom_hbond_angle_DHA 
 _geom_hbond_site_symmetry_A 
N1 H01B O1  0.831(15) 2.16(2) 2.885(3) 146(3) 2_667 
O1 H02 O5  0.802(18) 1.842(19) 2.642(3) 175(4) 2_667 
C44 H44 O1  0.95 2.50 3.394(4) 156.2 2_657 
 
_diffrn_measured_fraction_theta_max    0.918 
_diffrn_reflns_theta_full              26.00 
_diffrn_measured_fraction_theta_full   0.993 
_refine_diff_density_max    1.021 
_refine_diff_density_min   -0.443 
_refine_diff_density_rms    0.086 


#===END


 
data_joc431s 
 
_audit_creation_method            SHELXL-97 
_chemical_name_systematic 
; 
 ? 
; 
_chemical_name_common             ? 
_chemical_melting_point           ? 
_chemical_formula_moiety          ? 
_chemical_formula_sum 
 'C20 H30 Br2 N2 O4 Pd' 
_chemical_formula_weight          628.68 
 
loop_ 
 _atom_type_symbol 
 _atom_type_description 
 _atom_type_scat_dispersion_real 
 _atom_type_scat_dispersion_imag 
 _atom_type_scat_source 
 'C'  'C'   0.0033   0.0016 
 'International Tables Vol C Tables 4.2.6.8 and 6.1.1.4' 
 'H'  'H'   0.0000   0.0000 
 'International Tables Vol C Tables 4.2.6.8 and 6.1.1.4' 
 'N'  'N'   0.0061   0.0033 
 'International Tables Vol C Tables 4.2.6.8 and 6.1.1.4' 
 'O'  'O'   0.0106   0.0060 
 'International Tables Vol C Tables 4.2.6.8 and 6.1.1.4' 
 'Br'  'Br'  -0.2901   2.4595 
 'International Tables Vol C Tables 4.2.6.8 and 6.1.1.4' 
 'Pd'  'Pd'  -0.9988   1.0072 
 'International Tables Vol C Tables 4.2.6.8 and 6.1.1.4' 
 
_symmetry_cell_setting            triclinic  
_symmetry_space_group_name_H-M    'P -1'  
 
loop_ 
 _symmetry_equiv_pos_as_xyz 
 'x, y, z' 
 '-x, -y, -z' 
 
_cell_length_a                    8.3340(8) 
_cell_length_b                    8.4418(8) 
_cell_length_c                    17.1024(17) 
_cell_angle_alpha                 93.040(2) 
_cell_angle_beta                  100.487(2) 
_cell_angle_gamma                 93.215(2) 
_cell_volume                      1178.8(2) 
_cell_formula_units_Z             2 
_cell_measurement_temperature     100(2) 
_cell_measurement_reflns_used     6644 
_cell_measurement_theta_min       2.42 
_cell_measurement_theta_max       28.65
 
_exptl_crystal_description        lath  
_exptl_crystal_colour             pale-yellow
_exptl_crystal_size_max           0.13 
_exptl_crystal_size_mid           0.10 
_exptl_crystal_size_min           0.04 
_exptl_crystal_density_meas       ? 
_exptl_crystal_density_diffrn     1.771 
_exptl_crystal_density_method     'not measured' 
_exptl_crystal_F_000              624 
_exptl_absorpt_coefficient_mu     4.204 
_exptl_absorpt_correction_type    multi-scan 
_exptl_absorpt_correction_T_min   0.6582
_exptl_absorpt_correction_T_max   0.8499 
_exptl_absorpt_process_details    SADABS  
 
_exptl_special_details 
; 
 ? 
; 
 
_diffrn_ambient_temperature       100(2) 
_diffrn_radiation_wavelength      0.71073 
_diffrn_radiation_type            MoK\a 
_diffrn_radiation_source          'fine-focus sealed tube' 
_diffrn_radiation_monochromator   graphite 
_diffrn_measurement_device_type   'Bruker SMART APEX CCD' 
_diffrn_measurement_method        \w-scan  
_diffrn_detector_area_resol_mean  8.26 
_diffrn_standards_number          ? 
_diffrn_standards_interval_count  ? 
_diffrn_standards_interval_time   ? 
_diffrn_standards_decay_%         ? 
_diffrn_reflns_number             14520 
_diffrn_reflns_av_R_equivalents   0.0246 
_diffrn_reflns_av_sigmaI/netI     0.0316 
_diffrn_reflns_limit_h_min        -10 
_diffrn_reflns_limit_h_max        10 
_diffrn_reflns_limit_k_min        -11 
_diffrn_reflns_limit_k_max        11 
_diffrn_reflns_limit_l_min        -22 
_diffrn_reflns_limit_l_max        22 
_diffrn_reflns_theta_min          2.42 
_diffrn_reflns_theta_max          28.66 
_reflns_number_total              5550 
_reflns_number_gt                 5159 
_reflns_threshold_expression      >2sigma(I) 
 
_computing_data_collection        'Bruker SMART'  
_computing_cell_refinement        'Bruker SAINT'  
_computing_data_reduction         'Bruker SAINT'  
_computing_structure_solution     'SHELXS-97 (Sheldrick, 1990)' 
_computing_structure_refinement   'SHELXL-97 (Sheldrick, 1997)' 
_computing_molecular_graphics     'Bruker SHELXTL'    
_computing_publication_material   'Bruker SHELXTL'    
 
_refine_special_details 
; 
 Refinement of F^2^ against ALL reflections.  The weighted R-factor wR and 
 goodness of fit S are based on F^2^, conventional R-factors R are based 
 on F, with F set to zero for negative F^2^. The threshold expression of 
 F^2^ > 2sigma(F^2^) is used only for calculating R-factors(gt) etc. and is 
 not relevant to the choice of reflections for refinement.  R-factors based 
 on F^2^ are statistically about twice as large as those based on F, and R- 
 factors based on ALL data will be even larger. 
; 
 
_refine_ls_structure_factor_coef  Fsqd  
_refine_ls_matrix_type            full 
_refine_ls_weighting_scheme       calc  
_refine_ls_weighting_details 
 'calc w=1/[\s^2^(Fo^2^)+(0.0276P)^2^+1.1422P] where P=(Fo^2^+2Fc^2^)/3' 
_atom_sites_solution_primary      direct 
_atom_sites_solution_secondary    difmap 
_atom_sites_solution_hydrogens    geom 
_refine_ls_hydrogen_treatment     
'NH2 free with SADI, rigid methyls, others riding'
_refine_ls_extinction_method      none 
_refine_ls_extinction_coef        ? 
_refine_ls_number_reflns          5550 
_refine_ls_number_parameters      285 
_refine_ls_number_restraints      6 
_refine_ls_R_factor_all           0.0361 
_refine_ls_R_factor_gt            0.0328 
_refine_ls_wR_factor_ref          0.0704 
_refine_ls_wR_factor_gt           0.0690 
_refine_ls_goodness_of_fit_ref    1.120 
_refine_ls_restrained_S_all       1.119 
_refine_ls_shift/su_max           0.002 
_refine_ls_shift/su_mean          0.000 
 
loop_ 
 _atom_site_label 
 _atom_site_type_symbol 
 _atom_site_fract_x 
 _atom_site_fract_y 
 _atom_site_fract_z 
 _atom_site_U_iso_or_equiv 
 _atom_site_adp_type 
 _atom_site_occupancy 
 _atom_site_symmetry_multiplicity 
 _atom_site_calc_flag 
 _atom_site_refinement_flags 
 _atom_site_disorder_assembly 
 _atom_site_disorder_group 
Pd1 Pd 1.0000 1.0000 0.0000 0.01390(7) Uani 1 2 d S . . 
Br1 Br 1.23354(4) 0.95240(4) 0.100832(16) 0.02120(8) Uani 1 1 d . . . 
N1 N 0.8608(3) 1.0119(3) 0.08565(14) 0.0171(5) Uani 1 1 d D . . 
H01A H 0.923(3) 1.038(4) 0.1292(14) 0.017(8) Uiso 1 1 d D . . 
H01B H 0.797(4) 1.085(3) 0.076(2) 0.023(9) Uiso 1 1 d D . . 
C1 C 0.7636(4) 0.8631(4) 0.09318(17) 0.0217(6) Uani 1 1 d . . . 
H1A H 0.8360 0.7737 0.0975 0.026 Uiso 1 1 calc R . . 
H1B H 0.6786 0.8408 0.0447 0.026 Uiso 1 1 calc R . . 
C2 C 0.6816(4) 0.8746(4) 0.16655(17) 0.0239(7) Uani 1 1 d . . . 
H2A H 0.6034 0.9591 0.1603 0.029 Uiso 1 1 calc R . . 
H2B H 0.6190 0.7728 0.1699 0.029 Uiso 1 1 calc R . . 
C3 C 0.8041(3) 0.9107(3) 0.24274(17) 0.0187(6) Uani 1 1 d . . . 
C4 C 0.8393(3) 1.0678(3) 0.27457(16) 0.0171(6) Uani 1 1 d . . . 
H4 H 0.7820 1.1506 0.2489 0.021 Uiso 1 1 calc R . . 
C5 C 0.9557(3) 1.1045(3) 0.34254(16) 0.0171(6) Uani 1 1 d . . . 
C6 C 1.0401(3) 0.9815(3) 0.38112(17) 0.0188(6) Uani 1 1 d . . . 
C7 C 1.0058(4) 0.8268(4) 0.34957(18) 0.0221(6) Uani 1 1 d . . . 
H7 H 1.0625 0.7434 0.3750 0.026 Uiso 1 1 calc R . . 
C8 C 0.8883(4) 0.7920(4) 0.28052(18) 0.0231(6) Uani 1 1 d . . . 
H8 H 0.8662 0.6850 0.2593 0.028 Uiso 1 1 calc R . . 
C9 C 1.2329(4) 0.9058(4) 0.49073(19) 0.0336(8) Uani 1 1 d . . . 
H9A H 1.1515 0.8279 0.5035 0.050 Uiso 1 1 calc R . . 
H9B H 1.3017 0.9523 0.5402 0.050 Uiso 1 1 calc R . . 
H9C H 1.3014 0.8532 0.4577 0.050 Uiso 1 1 calc R . . 
O2 O 0.9981(3) 1.2532(2) 0.37785(12) 0.0231(5) Uani 1 1 d . . . 
C10 C 0.9172(4) 1.3808(4) 0.33966(19) 0.0258(7) Uani 1 1 d . . . 
H10A H 0.9463 1.3897 0.2870 0.039 Uiso 1 1 calc R . . 
H10B H 0.9512 1.4804 0.3721 0.039 Uiso 1 1 calc R . . 
H10C H 0.7986 1.3600 0.3337 0.039 Uiso 1 1 calc R . . 
O1 O 1.1514(3) 1.0289(3) 0.44808(12) 0.0252(5) Uani 1 1 d . . . 
Pd2 Pd 0.5000 0.5000 0.0000 0.01330(7) Uani 1 2 d S . . 
Br2 Br 0.67909(4) 0.37723(4) 0.104469(17) 0.02287(8) Uani 1 1 d . . . 
N2 N 0.3588(3) 0.5598(3) 0.08058(15) 0.0170(5) Uani 1 1 d D . . 
H02A H 0.419(3) 0.564(4) 0.1255(14) 0.017(8) Uiso 1 1 d D . . 
H02B H 0.321(4) 0.648(3) 0.0727(19) 0.019(8) Uiso 1 1 d D . . 
C21 C 0.2188(4) 0.4452(4) 0.08389(17) 0.0196(6) Uani 1 1 d . . . 
H21A H 0.2572 0.3364 0.0871 0.024 Uiso 1 1 calc R . . 
H21B H 0.1361 0.4471 0.0345 0.024 Uiso 1 1 calc R . . 
C22 C 0.1403(4) 0.4863(4) 0.15634(17) 0.0227(6) Uani 1 1 d . . . 
H22A H 0.0947 0.5918 0.1510 0.027 Uiso 1 1 calc R . . 
H22B H 0.0490 0.4069 0.1578 0.027 Uiso 1 1 calc R . . 
C23 C 0.2627(3) 0.4887(4) 0.23319(17) 0.0188(6) Uani 1 1 d . . . 
C24 C 0.3174(3) 0.3451(3) 0.26234(17) 0.0176(6) Uani 1 1 d . . . 
H24 H 0.2716 0.2474 0.2351 0.021 Uiso 1 1 calc R . . 
C25 C 0.4362(3) 0.3432(3) 0.32960(16) 0.0165(6) Uani 1 1 d . . . 
C26 C 0.5045(4) 0.4879(3) 0.37119(17) 0.0186(6) Uani 1 1 d . . . 
C27 C 0.4513(4) 0.6291(3) 0.34226(18) 0.0239(7) Uani 1 1 d . . . 
H27 H 0.4968 0.7273 0.3691 0.029 Uiso 1 1 calc R . . 
C28 C 0.3313(4) 0.6287(4) 0.27391(18) 0.0236(6) Uani 1 1 d . . . 
H28 H 0.2960 0.7270 0.2549 0.028 Uiso 1 1 calc R . . 
C29 C 0.4354(4) 0.0628(3) 0.31905(19) 0.0255(7) Uani 1 1 d . . . 
H29A H 0.3182 0.0471 0.3194 0.038 Uiso 1 1 calc R . . 
H29B H 0.4925 -0.0245 0.3448 0.038 Uiso 1 1 calc R . . 
H29C H 0.4525 0.0646 0.2639 0.038 Uiso 1 1 calc R . . 
O3 O 0.4981(3) 0.2101(2) 0.36133(12) 0.0214(4) Uani 1 1 d . . . 
C30 C 0.6967(4) 0.6196(4) 0.47832(19) 0.0291(7) Uani 1 1 d . . . 
H30A H 0.7522 0.6799 0.4424 0.044 Uiso 1 1 calc R . . 
H30B H 0.7766 0.5954 0.5249 0.044 Uiso 1 1 calc R . . 
H30C H 0.6129 0.6829 0.4956 0.044 Uiso 1 1 calc R . . 
O4 O 0.6208(3) 0.4737(2) 0.43715(12) 0.0222(4) Uani 1 1 d . . . 
 
loop_ 
 _atom_site_aniso_label 
 _atom_site_aniso_U_11 
 _atom_site_aniso_U_22 
 _atom_site_aniso_U_33 
 _atom_site_aniso_U_23 
 _atom_site_aniso_U_13 
 _atom_site_aniso_U_12 
Pd1 0.01620(15) 0.01359(14) 0.01061(14) -0.00020(10) -0.00143(11) 0.00348(11) 
Br1 0.02144(15) 0.02394(15) 0.01552(14) -0.00053(11) -0.00511(11) 0.00786(12) 
N1 0.0201(13) 0.0152(12) 0.0145(12) 0.0003(9) -0.0012(10) 0.0036(10) 
C1 0.0229(15) 0.0227(15) 0.0166(14) -0.0055(11) -0.0010(12) -0.0019(12) 
C2 0.0183(15) 0.0321(17) 0.0181(14) -0.0046(12) -0.0004(12) -0.0069(13) 
C3 0.0173(14) 0.0226(14) 0.0161(13) -0.0016(11) 0.0052(11) -0.0034(11) 
C4 0.0163(13) 0.0214(14) 0.0142(13) 0.0039(11) 0.0028(11) 0.0030(11) 
C5 0.0191(14) 0.0186(14) 0.0142(13) -0.0011(10) 0.0054(11) 0.0000(11) 
C6 0.0174(14) 0.0235(15) 0.0148(13) 0.0026(11) 0.0011(11) 0.0004(12) 
C7 0.0255(16) 0.0206(15) 0.0217(15) 0.0068(12) 0.0064(12) 0.0041(12) 
C8 0.0289(16) 0.0173(14) 0.0247(15) -0.0005(12) 0.0104(13) -0.0005(12) 
C9 0.0343(19) 0.046(2) 0.0193(16) 0.0080(14) -0.0052(14) 0.0152(16) 
O2 0.0281(12) 0.0172(10) 0.0212(11) -0.0017(8) -0.0019(9) 0.0006(9) 
C10 0.0312(17) 0.0194(15) 0.0262(16) 0.0009(12) 0.0036(13) 0.0034(13) 
O1 0.0258(11) 0.0290(12) 0.0175(10) 0.0041(9) -0.0054(9) 0.0023(9) 
Pd2 0.01261(14) 0.01363(14) 0.01313(14) 0.00078(10) 0.00059(11) 0.00229(11) 
Br2 0.02325(16) 0.02736(16) 0.01765(15) 0.00335(11) -0.00079(11) 0.01200(12) 
N2 0.0165(12) 0.0175(12) 0.0164(12) 0.0013(9) 0.0007(10) 0.0040(10) 
C21 0.0174(14) 0.0235(15) 0.0167(13) 0.0018(11) 0.0001(11) -0.0001(12) 
C22 0.0162(14) 0.0320(17) 0.0212(15) 0.0079(12) 0.0041(12) 0.0061(12) 
C23 0.0151(13) 0.0272(15) 0.0160(14) 0.0038(11) 0.0055(11) 0.0051(12) 
C24 0.0187(14) 0.0166(13) 0.0169(13) 0.0000(10) 0.0025(11) -0.0001(11) 
C25 0.0190(14) 0.0156(13) 0.0158(13) 0.0003(10) 0.0054(11) 0.0015(11) 
C26 0.0197(14) 0.0209(14) 0.0151(13) -0.0018(11) 0.0045(11) 0.0003(12) 
C27 0.0353(18) 0.0136(14) 0.0230(15) -0.0028(11) 0.0083(13) -0.0013(13) 
C28 0.0313(17) 0.0183(14) 0.0237(15) 0.0043(12) 0.0084(13) 0.0084(13) 
C29 0.0314(17) 0.0141(14) 0.0274(16) 0.0009(12) -0.0034(13) -0.0002(12) 
O3 0.0270(11) 0.0146(10) 0.0190(10) -0.0003(8) -0.0048(9) 0.0013(8) 
C30 0.0320(18) 0.0312(17) 0.0208(15) -0.0086(13) 0.0030(13) -0.0121(14) 
O4 0.0253(11) 0.0219(11) 0.0166(10) -0.0042(8) -0.0012(9) -0.0022(9) 
 
_geom_special_details 
; 
 All esds (except the esd in the dihedral angle between two l.s. planes) 
 are estimated using the full covariance matrix.  The cell esds are taken 
 into account individually in the estimation of esds in distances, angles 
 and torsion angles; correlations between esds in cell parameters are only 
 used when they are defined by crystal symmetry.  An approximate (isotropic) 
 treatment of cell esds is used for estimating esds involving l.s. planes. 
; 
 
loop_ 
 _geom_bond_atom_site_label_1 
 _geom_bond_atom_site_label_2 
 _geom_bond_distance 
 _geom_bond_site_symmetry_2 
 _geom_bond_publ_flag 
Pd1 N1 2.029(2) 2_775 ? 
Pd1 N1 2.029(2) . ? 
Pd1 Br1 2.4213(3) 2_775 ? 
Pd1 Br1 2.4213(3) . ? 
N1 C1 1.480(4) . ? 
C1 C2 1.536(4) . ? 
C2 C3 1.507(4) . ? 
C3 C8 1.378(4) . ? 
C3 C4 1.401(4) . ? 
C4 C5 1.381(4) . ? 
C5 O2 1.363(3) . ? 
C5 C6 1.412(4) . ? 
C6 O1 1.362(3) . ? 
C6 C7 1.380(4) . ? 
C7 C8 1.396(4) . ? 
C9 O1 1.433(4) . ? 
O2 C10 1.427(4) . ? 
Pd2 N2 2.030(2) . ? 
Pd2 N2 2.030(2) 2_665 ? 
Pd2 Br2 2.4276(3) . ? 
Pd2 Br2 2.4276(3) 2_665 ? 
N2 C21 1.484(4) . ? 
C21 C22 1.536(4) . ? 
C22 C23 1.508(4) . ? 
C23 C28 1.378(4) . ? 
C23 C24 1.403(4) . ? 
C24 C25 1.376(4) . ? 
C25 O3 1.361(3) . ? 
C25 C26 1.416(4) . ? 
C26 O4 1.362(4) . ? 
C26 C27 1.380(4) . ? 
C27 C28 1.393(4) . ? 
C29 O3 1.427(3) . ? 
C30 O4 1.440(3) . ? 
 
loop_ 
 _geom_angle_atom_site_label_1 
 _geom_angle_atom_site_label_2 
 _geom_angle_atom_site_label_3 
 _geom_angle 
 _geom_angle_site_symmetry_1 
 _geom_angle_site_symmetry_3 
 _geom_angle_publ_flag 
N1 Pd1 N1 180.0 2_775 . ? 
N1 Pd1 Br1 89.33(7) 2_775 2_775 ? 
N1 Pd1 Br1 90.67(7) . 2_775 ? 
N1 Pd1 Br1 90.67(7) 2_775 . ? 
N1 Pd1 Br1 89.33(7) . . ? 
Br1 Pd1 Br1 180.0 2_775 . ? 
C1 N1 Pd1 114.88(18) . . ? 
N1 C1 C2 111.5(2) . . ? 
C3 C2 C1 112.2(2) . . ? 
C8 C3 C4 118.7(3) . . ? 
C8 C3 C2 121.0(3) . . ? 
C4 C3 C2 120.2(3) . . ? 
C5 C4 C3 121.2(3) . . ? 
O2 C5 C4 125.4(3) . . ? 
O2 C5 C6 115.1(2) . . ? 
C4 C5 C6 119.5(3) . . ? 
O1 C6 C7 125.5(3) . . ? 
O1 C6 C5 115.3(3) . . ? 
C7 C6 C5 119.3(3) . . ? 
C6 C7 C8 120.4(3) . . ? 
C3 C8 C7 120.8(3) . . ? 
C5 O2 C10 116.6(2) . . ? 
C6 O1 C9 116.5(2) . . ? 
N2 Pd2 N2 180.0 . 2_665 ? 
N2 Pd2 Br2 88.73(7) . . ? 
N2 Pd2 Br2 91.27(7) 2_665 . ? 
N2 Pd2 Br2 91.27(7) . 2_665 ? 
N2 Pd2 Br2 88.73(7) 2_665 2_665 ? 
Br2 Pd2 Br2 180.000(13) . 2_665 ? 
C21 N2 Pd2 115.68(18) . . ? 
N2 C21 C22 111.0(2) . . ? 
C23 C22 C21 111.5(2) . . ? 
C28 C23 C24 118.1(3) . . ? 
C28 C23 C22 122.1(3) . . ? 
C24 C23 C22 119.7(3) . . ? 
C25 C24 C23 121.2(3) . . ? 
O3 C25 C24 125.2(2) . . ? 
O3 C25 C26 114.8(2) . . ? 
C24 C25 C26 120.0(3) . . ? 
O4 C26 C27 125.6(3) . . ? 
O4 C26 C25 115.6(3) . . ? 
C27 C26 C25 118.7(3) . . ? 
C26 C27 C28 120.4(3) . . ? 
C23 C28 C27 121.5(3) . . ? 
C25 O3 C29 116.0(2) . . ? 
C26 O4 C30 116.4(2) . . ? 
 
loop_ 
 _geom_hbond_atom_site_label_D 
 _geom_hbond_atom_site_label_H 
 _geom_hbond_atom_site_label_A 
 _geom_hbond_distance_DH 
 _geom_hbond_distance_HA 
 _geom_hbond_distance_DA 
 _geom_hbond_angle_DHA 
 _geom_hbond_site_symmetry_A 
N1 H01B Br2  0.84(2) 2.76(2) 3.536(2) 155(3) 1_565 
N2 H02B Br1  0.83(2) 2.75(2) 3.549(3) 161(3) 1_455 
C30 H30B O2  0.98 2.51 3.288(4) 136.3 2_776 
 
_diffrn_measured_fraction_theta_max    0.914 
_diffrn_reflns_theta_full              27.00 
_diffrn_measured_fraction_theta_full   0.993 
_refine_diff_density_max    0.970 
_refine_diff_density_min   -0.519 
_refine_diff_density_rms    0.105 


#===END


 
data_jad693si 
 
_audit_creation_method            SHELXL-97 
_chemical_name_systematic 
; 
 ? 
; 
_chemical_name_common             ? 
_chemical_melting_point           ? 
_chemical_formula_moiety          ? 
_chemical_formula_sum 
 'C24 H40 N2 O10 Pd' 
_chemical_formula_weight          622.98 
 
loop_ 
 _atom_type_symbol 
 _atom_type_description 
 _atom_type_scat_dispersion_real 
 _atom_type_scat_dispersion_imag 
 _atom_type_scat_source 
 'C'  'C'   0.0033   0.0016 
 'International Tables Vol C Tables 4.2.6.8 and 6.1.1.4' 
 'H'  'H'   0.0000   0.0000 
 'International Tables Vol C Tables 4.2.6.8 and 6.1.1.4' 
 'N'  'N'   0.0061   0.0033 
 'International Tables Vol C Tables 4.2.6.8 and 6.1.1.4' 
 'O'  'O'   0.0106   0.0060 
 'International Tables Vol C Tables 4.2.6.8 and 6.1.1.4' 
 'Pd'  'Pd'  -0.9988   1.0072 
 'International Tables Vol C Tables 4.2.6.8 and 6.1.1.4' 
 
_symmetry_cell_setting            monoclinic  
_symmetry_space_group_name_H-M    'P 2(1)/c' 
 
loop_ 
 _symmetry_equiv_pos_as_xyz 
 'x, y, z' 
 '-x, y+1/2, -z+1/2' 
 '-x, -y, -z' 
 'x, -y-1/2, z-1/2' 
 
_cell_length_a                    16.5114(7) 
_cell_length_b                    5.3548(2) 
_cell_length_c                    16.3972(7) 
_cell_angle_alpha                 90.00 
_cell_angle_beta                  109.139(2) 
_cell_angle_gamma                 90.00 
_cell_volume                      1369.63(10) 
_cell_formula_units_Z             2 
_cell_measurement_temperature     100(2) 
_cell_measurement_reflns_used     8119 
_cell_measurement_theta_min       2.52 
_cell_measurement_theta_max       28.05 
 
_exptl_crystal_description        block  
_exptl_crystal_colour             red  
_exptl_crystal_size_max           0.25 
_exptl_crystal_size_mid           0.18 
_exptl_crystal_size_min           0.09 
_exptl_crystal_density_meas       ? 
_exptl_crystal_density_diffrn     1.511 
_exptl_crystal_density_method     'not measured' 
_exptl_crystal_F_000              648 
_exptl_absorpt_coefficient_mu     0.734 
_exptl_absorpt_correction_type    multi-scan 
_exptl_absorpt_correction_T_min   0.8378 
_exptl_absorpt_correction_T_max   0.9369 
_exptl_absorpt_process_details    SADABS  
 
_exptl_special_details 
; 
 ? 
; 
 
_diffrn_ambient_temperature       100(2) 
_diffrn_radiation_wavelength      0.71073 
_diffrn_radiation_type            MoK\a 
_diffrn_radiation_source          'fine-focus sealed tube' 
_diffrn_radiation_monochromator   graphite 
_diffrn_measurement_device_type   'Bruker SMART APEX CCD'  
_diffrn_measurement_method        \w-scan 
_diffrn_detector_area_resol_mean  8.26 
_diffrn_standards_number          ? 
_diffrn_standards_interval_count  ? 
_diffrn_standards_interval_time   ? 
_diffrn_standards_decay_%         ? 
_diffrn_reflns_number             14946 
_diffrn_reflns_av_R_equivalents   0.0238 
_diffrn_reflns_av_sigmaI/netI     0.0209 
_diffrn_reflns_limit_h_min        -21 
_diffrn_reflns_limit_h_max        21 
_diffrn_reflns_limit_k_min        -7 
_diffrn_reflns_limit_k_max        7 
_diffrn_reflns_limit_l_min        -21 
_diffrn_reflns_limit_l_max        21 
_diffrn_reflns_theta_min          2.52 
_diffrn_reflns_theta_max          28.13 
_reflns_number_total              3168 
_reflns_number_gt                 2979 
_reflns_threshold_expression      >2sigma(I) 
 
_computing_data_collection        'Bruker SMART'  
_computing_cell_refinement        'Bruker SAINT' 
_computing_data_reduction         'Bruker SAINT' 
_computing_structure_solution     'SHELXS-97 (Sheldrick, 1990)' 
_computing_structure_refinement   'SHELXL-97 (Sheldrick, 1997)' 
_computing_molecular_graphics     'Bruker SHELXTL' 
_computing_publication_material   'Bruker SHELXTL' 
 
_refine_special_details 
; 
 Refinement of F^2^ against ALL reflections.  The weighted R-factor wR and 
 goodness of fit S are based on F^2^, conventional R-factors R are based 
 on F, with F set to zero for negative F^2^. The threshold expression of 
 F^2^ > 2sigma(F^2^) is used only for calculating R-factors(gt) etc. and is 
 not relevant to the choice of reflections for refinement.  R-factors based 
 on F^2^ are statistically about twice as large as those based on F, and R- 
 factors based on ALL data will be even larger. 
; 
 
_refine_ls_structure_factor_coef  Fsqd  
_refine_ls_matrix_type            full 
_refine_ls_weighting_scheme       calc  
_refine_ls_weighting_details 
 'calc w=1/[\s^2^(Fo^2^)+(0.0254P)^2^+1.6359P] where P=(Fo^2^+2Fc^2^)/3' 
_atom_sites_solution_primary      direct 
_atom_sites_solution_secondary    difmap 
_atom_sites_solution_hydrogens    geom 
_refine_ls_hydrogen_treatment     
'water H free with SADI, NH2 free, rigid methyls others riding'
_refine_ls_extinction_method      none 
_refine_ls_extinction_coef        ? 
_refine_ls_number_reflns          3168 
_refine_ls_number_parameters      188 
_refine_ls_number_restraints      1 
_refine_ls_R_factor_all           0.0327 
_refine_ls_R_factor_gt            0.0301 
_refine_ls_wR_factor_ref          0.0671 
_refine_ls_wR_factor_gt           0.0657 
_refine_ls_goodness_of_fit_ref    1.117 
_refine_ls_restrained_S_all       1.116 
_refine_ls_shift/su_max           0.000 
_refine_ls_shift/su_mean          0.000 
 
loop_ 
 _atom_site_label 
 _atom_site_type_symbol 
 _atom_site_fract_x 
 _atom_site_fract_y 
 _atom_site_fract_z 
 _atom_site_U_iso_or_equiv 
 _atom_site_adp_type 
 _atom_site_occupancy 
 _atom_site_symmetry_multiplicity 
 _atom_site_calc_flag 
 _atom_site_refinement_flags 
 _atom_site_disorder_assembly 
 _atom_site_disorder_group 
Pd1 Pd 0.5000 0.0000 0.0000 0.01332(7) Uani 1 2 d S . . 
N1 N 0.58155(11) 0.2920(3) 0.04792(12) 0.0169(3) Uani 1 1 d . . . 
H01A H 0.5787(17) 0.394(5) 0.0077(18) 0.025(7) Uiso 1 1 d . . . 
H01B H 0.5637(16) 0.373(5) 0.0830(17) 0.024(7) Uiso 1 1 d . . . 
O1 O 0.40917(9) 0.2043(3) 0.02659(9) 0.0171(3) Uani 1 1 d . . . 
O2 O 0.42547(12) -0.0043(3) 0.14860(11) 0.0302(4) Uani 1 1 d . . . 
O3 O 1.03057(10) 0.0570(3) 0.39169(10) 0.0248(3) Uani 1 1 d . . . 
O4 O 0.92814(10) 0.3873(3) 0.41778(10) 0.0252(3) Uani 1 1 d . . . 
C1 C 0.67336(12) 0.2421(4) 0.09448(13) 0.0186(4) Uani 1 1 d . . . 
H1A H 0.7038 0.4019 0.1135 0.022 Uiso 1 1 calc R . . 
H1B H 0.6993 0.1586 0.0552 0.022 Uiso 1 1 calc R . . 
C2 C 0.68333(13) 0.0763(4) 0.17282(14) 0.0204(4) Uani 1 1 d . . . 
H2A H 0.6481 0.1443 0.2062 0.024 Uiso 1 1 calc R . . 
H2B H 0.6621 -0.0935 0.1531 0.024 Uiso 1 1 calc R . . 
C3 C 0.77590(13) 0.0609(4) 0.23050(14) 0.0192(4) Uani 1 1 d . . . 
C4 C 0.80723(13) 0.2337(4) 0.29803(13) 0.0196(4) Uani 1 1 d . . . 
H4 H 0.7696 0.3556 0.3078 0.023 Uiso 1 1 calc R . . 
C5 C 0.89223(13) 0.2290(4) 0.35058(13) 0.0207(4) Uani 1 1 d . . . 
C6 C 0.94802(13) 0.0490(4) 0.33595(14) 0.0204(4) Uani 1 1 d . . . 
C7 C 0.91813(14) -0.1197(4) 0.26946(14) 0.0227(4) Uani 1 1 d . . . 
H7 H 0.9558 -0.2409 0.2594 0.027 Uiso 1 1 calc R . . 
C8 C 0.83174(14) -0.1124(4) 0.21643(14) 0.0230(4) Uani 1 1 d . . . 
H8 H 0.8116 -0.2283 0.1703 0.028 Uiso 1 1 calc R . . 
C9 C 0.87298(15) 0.5667(5) 0.43696(15) 0.0264(5) Uani 1 1 d . . . 
H9A H 0.8484 0.6753 0.3868 0.040 Uiso 1 1 calc R . . 
H9B H 0.9060 0.6677 0.4866 0.040 Uiso 1 1 calc R . . 
H9C H 0.8267 0.4801 0.4506 0.040 Uiso 1 1 calc R . . 
C10 C 1.08524(14) -0.1431(5) 0.38699(15) 0.0281(5) Uani 1 1 d . . . 
H10A H 1.0586 -0.3021 0.3935 0.042 Uiso 1 1 calc R . . 
H10B H 1.1404 -0.1261 0.4333 0.042 Uiso 1 1 calc R . . 
H10C H 1.0945 -0.1394 0.3310 0.042 Uiso 1 1 calc R . . 
C11 C 0.39390(13) 0.1661(4) 0.09720(13) 0.0202(4) Uani 1 1 d . . . 
C12 C 0.33254(15) 0.3515(5) 0.11475(16) 0.0271(5) Uani 1 1 d . . . 
H12A H 0.3142 0.2904 0.1622 0.041 Uiso 1 1 calc R . . 
H12B H 0.2824 0.3713 0.0628 0.041 Uiso 1 1 calc R . . 
H12C H 0.3613 0.5131 0.1306 0.041 Uiso 1 1 calc R . . 
O99 O 0.53819(12) 0.5869(3) 0.17428(11) 0.0281(4) Uani 1 1 d D . . 
H09A H 0.549(2) 0.552(6) 0.2249(16) 0.046(10) Uiso 1 1 d D . . 
H09B H 0.509(2) 0.714(6) 0.165(2) 0.061(11) Uiso 1 1 d D . . 
 
loop_ 
 _atom_site_aniso_label 
 _atom_site_aniso_U_11 
 _atom_site_aniso_U_22 
 _atom_site_aniso_U_33 
 _atom_site_aniso_U_23 
 _atom_site_aniso_U_13 
 _atom_site_aniso_U_12 
Pd1 0.01154(11) 0.01536(11) 0.01182(11) -0.00062(8) 0.00212(7) 0.00048(8) 
N1 0.0156(8) 0.0168(9) 0.0168(8) -0.0002(7) 0.0033(7) 0.0001(7) 
O1 0.0144(7) 0.0207(7) 0.0157(7) -0.0002(6) 0.0043(5) 0.0023(6) 
O2 0.0437(10) 0.0250(9) 0.0268(8) 0.0052(7) 0.0182(8) 0.0073(8) 
O3 0.0160(7) 0.0294(9) 0.0234(8) -0.0041(6) -0.0012(6) 0.0032(6) 
O4 0.0193(7) 0.0282(9) 0.0227(8) -0.0071(7) -0.0006(6) 0.0020(7) 
C1 0.0141(9) 0.0199(10) 0.0201(10) 0.0003(8) 0.0034(8) -0.0021(8) 
C2 0.0138(9) 0.0234(10) 0.0207(10) 0.0019(8) 0.0011(8) -0.0024(8) 
C3 0.0158(10) 0.0194(10) 0.0198(10) 0.0049(8) 0.0023(8) -0.0017(8) 
C4 0.0170(10) 0.0196(10) 0.0210(10) 0.0015(8) 0.0049(8) 0.0008(8) 
C5 0.0194(10) 0.0229(11) 0.0178(10) 0.0004(8) 0.0033(8) -0.0020(8) 
C6 0.0152(9) 0.0231(11) 0.0198(10) 0.0027(8) 0.0018(8) -0.0001(8) 
C7 0.0208(11) 0.0214(11) 0.0259(11) 0.0002(9) 0.0076(9) 0.0018(8) 
C8 0.0230(11) 0.0228(11) 0.0200(10) -0.0010(9) 0.0029(8) -0.0046(9) 
C9 0.0256(11) 0.0285(12) 0.0222(11) -0.0052(9) 0.0039(9) 0.0026(9) 
C10 0.0202(11) 0.0313(13) 0.0286(12) 0.0025(10) 0.0022(9) 0.0070(9) 
C11 0.0183(10) 0.0203(10) 0.0222(10) -0.0029(8) 0.0070(8) -0.0032(8) 
C12 0.0254(11) 0.0276(12) 0.0328(12) -0.0031(10) 0.0157(10) 0.0007(9) 
O99 0.0367(10) 0.0268(9) 0.0212(8) -0.0019(7) 0.0101(7) 0.0039(8) 
 
_geom_special_details 
; 
 All esds (except the esd in the dihedral angle between two l.s. planes) 
 are estimated using the full covariance matrix.  The cell esds are taken 
 into account individually in the estimation of esds in distances, angles 
 and torsion angles; correlations between esds in cell parameters are only 
 used when they are defined by crystal symmetry.  An approximate (isotropic) 
 treatment of cell esds is used for estimating esds involving l.s. planes. 
; 
 
loop_ 
 _geom_bond_atom_site_label_1 
 _geom_bond_atom_site_label_2 
 _geom_bond_distance 
 _geom_bond_site_symmetry_2 
 _geom_bond_publ_flag 
Pd1 O1 2.0161(14) 3_655 ? 
Pd1 O1 2.0161(14) . ? 
Pd1 N1 2.0451(17) 3_655 ? 
Pd1 N1 2.0451(17) . ? 
N1 C1 1.481(3) . ? 
O1 C11 1.280(2) . ? 
O2 C11 1.236(3) . ? 
O3 C6 1.370(2) . ? 
O3 C10 1.420(3) . ? 
O4 C5 1.362(3) . ? 
O4 C9 1.428(3) . ? 
C1 C2 1.525(3) . ? 
C2 C3 1.513(3) . ? 
C3 C8 1.380(3) . ? 
C3 C4 1.405(3) . ? 
C4 C5 1.386(3) . ? 
C5 C6 1.407(3) . ? 
C6 C7 1.377(3) . ? 
C7 C8 1.407(3) . ? 
C11 C12 1.512(3) . ? 
 
loop_ 
 _geom_angle_atom_site_label_1 
 _geom_angle_atom_site_label_2 
 _geom_angle_atom_site_label_3 
 _geom_angle 
 _geom_angle_site_symmetry_1 
 _geom_angle_site_symmetry_3 
 _geom_angle_publ_flag 
O1 Pd1 O1 180.0 3_655 . ? 
O1 Pd1 N1 86.83(7) 3_655 3_655 ? 
O1 Pd1 N1 93.17(7) . 3_655 ? 
O1 Pd1 N1 93.17(7) 3_655 . ? 
O1 Pd1 N1 86.83(7) . . ? 
N1 Pd1 N1 180.0 3_655 . ? 
C1 N1 Pd1 119.58(13) . . ? 
C11 O1 Pd1 119.35(13) . . ? 
C6 O3 C10 116.82(17) . . ? 
C5 O4 C9 117.18(17) . . ? 
N1 C1 C2 110.42(16) . . ? 
C3 C2 C1 111.48(17) . . ? 
C8 C3 C4 118.77(19) . . ? 
C8 C3 C2 121.7(2) . . ? 
C4 C3 C2 119.47(19) . . ? 
C5 C4 C3 120.9(2) . . ? 
O4 C5 C4 125.1(2) . . ? 
O4 C5 C6 115.37(18) . . ? 
C4 C5 C6 119.5(2) . . ? 
O3 C6 C7 124.7(2) . . ? 
O3 C6 C5 115.36(19) . . ? 
C7 C6 C5 119.98(19) . . ? 
C6 C7 C8 119.9(2) . . ? 
C3 C8 C7 120.9(2) . . ? 
O2 C11 O1 124.8(2) . . ? 
O2 C11 C12 121.0(2) . . ? 
O1 C11 C12 114.23(19) . . ? 
 
loop_ 
 _geom_hbond_atom_site_label_D 
 _geom_hbond_atom_site_label_H 
 _geom_hbond_atom_site_label_A 
 _geom_hbond_distance_DH 
 _geom_hbond_distance_HA 
 _geom_hbond_distance_DA 
 _geom_hbond_angle_DHA 
 _geom_hbond_site_symmetry_A 
N1 H01B O99  0.85(3) 2.03(3) 2.876(3) 172(2) . 
N1 H01A O1  0.85(3) 2.25(3) 2.985(2) 146(2) 3_665 
O99 H09A O2  0.81(2) 2.00(2) 2.809(2) 175(3) 2_655 
O99 H09B O2  0.82(2) 2.00(2) 2.814(2) 172(4) 1_565 
 
_diffrn_measured_fraction_theta_max    0.951 
_diffrn_reflns_theta_full              26.00 
_diffrn_measured_fraction_theta_full   1.000 
_refine_diff_density_max    0.666 
_refine_diff_density_min   -0.259 
_refine_diff_density_rms    0.072 


#===END


 
data_joc272s_squeezed 
 
_audit_creation_method            SHELXL-97 
_chemical_name_systematic 
; 
 ? 
; 
_chemical_name_common             ? 
_chemical_melting_point           ? 
_chemical_formula_moiety          ? 
_chemical_formula_sum 
 'C32 H36 N O6 P Pd' 
_chemical_formula_weight          667.99 
 
loop_ 
 _atom_type_symbol 
 _atom_type_description 
 _atom_type_scat_dispersion_real 
 _atom_type_scat_dispersion_imag 
 _atom_type_scat_source 
 'C'  'C'   0.0033   0.0016 
 'International Tables Vol C Tables 4.2.6.8 and 6.1.1.4' 
 'H'  'H'   0.0000   0.0000 
 'International Tables Vol C Tables 4.2.6.8 and 6.1.1.4' 
 'N'  'N'   0.0061   0.0033 
 'International Tables Vol C Tables 4.2.6.8 and 6.1.1.4' 
 'O'  'O'   0.0106   0.0060 
 'International Tables Vol C Tables 4.2.6.8 and 6.1.1.4' 
 'P'  'P'   0.1023   0.0942 
 'International Tables Vol C Tables 4.2.6.8 and 6.1.1.4' 
 'Pd'  'Pd'  -0.9988   1.0072 
 'International Tables Vol C Tables 4.2.6.8 and 6.1.1.4' 
 
_symmetry_cell_setting            triclinic  
_symmetry_space_group_name_H-M    'P -1' 
 
loop_ 
 _symmetry_equiv_pos_as_xyz 
 'x, y, z' 
 '-x, -y, -z' 
 
_cell_length_a                    10.7469(9) 
_cell_length_b                    12.5246(11) 
_cell_length_c                    12.5931(11) 
_cell_angle_alpha                 79.641(2) 
_cell_angle_beta                  82.117(2) 
_cell_angle_gamma                 81.423(2) 
_cell_volume                      1638.1(2) 
_cell_formula_units_Z             2 
_cell_measurement_temperature     100(2) 
_cell_measurement_reflns_used     6496 
_cell_measurement_theta_min       2.38 
_cell_measurement_theta_max       28.69 
 
_exptl_crystal_description        block 
_exptl_crystal_colour             yellow 
_exptl_crystal_size_max           0.26 
_exptl_crystal_size_mid           0.26 
_exptl_crystal_size_min           0.08 
_exptl_crystal_density_meas       ? 
_exptl_crystal_density_diffrn     1.354 
_exptl_crystal_density_method     'not measured' 
_exptl_crystal_F_000              688 
_exptl_absorpt_coefficient_mu     0.656 
_exptl_absorpt_correction_type    multi-scan 
_exptl_absorpt_correction_T_min   0.7536
_exptl_absorpt_correction_T_max   0.9494 
_exptl_absorpt_process_details    SADABS
 
_exptl_special_details 
; 
 ? 
; 
 
_diffrn_ambient_temperature       100(2) 
_diffrn_radiation_wavelength      0.71073 
_diffrn_radiation_type            MoK\a 
_diffrn_radiation_source          'fine-focus sealed tube' 
_diffrn_radiation_monochromator   graphite 
_diffrn_measurement_device_type   'Bruker SMART APEX CCD' 
_diffrn_measurement_method        \w-scan 
_diffrn_detector_area_resol_mean  8.26 
_diffrn_standards_number          ? 
_diffrn_standards_interval_count  ? 
_diffrn_standards_interval_time   ? 
_diffrn_standards_decay_%         ? 
_diffrn_reflns_number             20420 
_diffrn_reflns_av_R_equivalents   0.0196 
_diffrn_reflns_av_sigmaI/netI     0.0243 
_diffrn_reflns_limit_h_min        -13 
_diffrn_reflns_limit_h_max        14 
_diffrn_reflns_limit_k_min        -16 
_diffrn_reflns_limit_k_max        16 
_diffrn_reflns_limit_l_min        -16 
_diffrn_reflns_limit_l_max        16 
_diffrn_reflns_theta_min          1.65 
_diffrn_reflns_theta_max          28.69 
_reflns_number_total              7684 
_reflns_number_gt                 7272 
_reflns_threshold_expression      >2sigma(I) 
 
_computing_data_collection        'Bruker SMART' 
_computing_cell_refinement        'Bruker SAINT'  
_computing_data_reduction         'Bruker SAINT'  
_computing_structure_solution     'SHELXS-97 (Sheldrick, 1990)' 
_computing_structure_refinement   'SHELXL-97 (Sheldrick, 1997)' 
_computing_molecular_graphics     'Bruker SHELXTL' 
_computing_publication_material   'Bruker SHELXTL' 
 
_refine_special_details 
; 
 Refinement of F^2^ against ALL reflections.  The weighted R-factor wR and 
 goodness of fit S are based on F^2^, conventional R-factors R are based 
 on F, with F set to zero for negative F^2^. The threshold expression of 
 F^2^ > 2sigma(F^2^) is used only for calculating R-factors(gt) etc. and is 
 not relevant to the choice of reflections for refinement.  R-factors based 
 on F^2^ are statistically about twice as large as those based on F, and R- 
 factors based on ALL data will be even larger. 

One O(ME) is disordered over two positions, ca 55:45%.

There is a poorly-resolved region of residual elelctron density

 about an inversion center; this could not be adequately modelled and so was

 "removed" using the program SQUEEZE, which is part of the PLATON system.

 The void volume per cell was 184 \%A^3^, with a void electron count per cell

 of 46. This additional solvent was NOT taken account of when calculating

 derived parameters such as the formula weight, because the nature of the

 solvent was uncertain.


; 
 
_refine_ls_structure_factor_coef  Fsqd  
_refine_ls_matrix_type            full 
_refine_ls_weighting_scheme       calc  
_refine_ls_weighting_details 
 'calc w=1/[\s^2^(Fo^2^)+(0.0284P)^2^+1.0886P] where P=(Fo^2^+2Fc^2^)/3' 
_atom_sites_solution_primary      direct 
_atom_sites_solution_secondary    difmap 
_atom_sites_solution_hydrogens    geom 
_refine_ls_hydrogen_treatment     
'NH2 free with SADI, ordered methyls rigid others riding'
_refine_ls_extinction_method      none 
_refine_ls_extinction_coef        ? 
_refine_ls_number_reflns          7684 
_refine_ls_number_parameters      390 
_refine_ls_number_restraints      342 
_refine_ls_R_factor_all           0.0274 
_refine_ls_R_factor_gt            0.0257 
_refine_ls_wR_factor_ref          0.0629 
_refine_ls_wR_factor_gt           0.0621 
_refine_ls_goodness_of_fit_ref    1.049 
_refine_ls_restrained_S_all       1.026 
_refine_ls_shift/su_max           0.003 
_refine_ls_shift/su_mean          0.000 
 
loop_ 
 _atom_site_label 
 _atom_site_type_symbol 
 _atom_site_fract_x 
 _atom_site_fract_y 
 _atom_site_fract_z 
 _atom_site_U_iso_or_equiv 
 _atom_site_adp_type 
 _atom_site_occupancy 
 _atom_site_symmetry_multiplicity 
 _atom_site_calc_flag 
 _atom_site_refinement_flags 
 _atom_site_disorder_assembly 
 _atom_site_disorder_group 
Pd1 Pd -0.067097(10) 0.203405(9) 0.918767(9) 0.01367(4) Uani 1 1 d . . . 
P1 P -0.23088(4) 0.33470(3) 0.94460(3) 0.01486(8) Uani 1 1 d . . . 
N1 N 0.08209(13) 0.07817(11) 0.89473(11) 0.0168(3) Uani 1 1 d DU . . 
H01A H 0.1053(18) 0.0569(16) 0.9547(14) 0.018(5) Uiso 1 1 d D . . 
H01B H 0.0549(18) 0.0289(14) 0.8750(15) 0.016(5) Uiso 1 1 d D . . 
O2 O 0.58612(14) 0.19481(12) 0.39706(11) 0.0365(3) Uani 1 1 d U . . 
O3 O -0.16051(11) 0.16916(9) 0.80248(9) 0.0192(2) Uani 1 1 d U . . 
O4 O -0.18672(11) 0.00295(10) 0.89786(10) 0.0227(2) Uani 1 1 d U . . 
O5 O 0.03149(11) 0.24769(9) 1.02414(9) 0.0186(2) Uani 1 1 d U . . 
O6 O -0.07793(12) 0.14450(10) 1.15830(10) 0.0229(2) Uani 1 1 d U . . 
C1 C 0.19357(15) 0.11021(14) 0.81947(13) 0.0204(3) Uani 1 1 d U . . 
H1A H 0.2499 0.0435 0.8037 0.024 Uiso 1 1 calc R . . 
H2B H 0.2415 0.1528 0.8549 0.024 Uiso 1 1 calc R . . 
C2 C 0.15587(17) 0.17842(15) 0.71334(14) 0.0256(4) Uani 1 1 d U . . 
H2A H 0.0893 0.1454 0.6882 0.031 Uiso 1 1 calc R . . 
H3B H 0.1197 0.2530 0.7263 0.031 Uiso 1 1 calc R . . 
C3 C 0.26674(17) 0.18614(14) 0.62541(14) 0.0239(3) Uani 1 1 d DU . . 
C4 C 0.36136(17) 0.24957(16) 0.62951(14) 0.0255(4) Uani 1 1 d U A . 
H4 H 0.3541 0.2916 0.6863 0.031 Uiso 1 1 calc R . . 
C5 C 0.46649(17) 0.25222(16) 0.55140(15) 0.0271(4) Uani 1 1 d U . . 
C6 C 0.47893(18) 0.18835(15) 0.46897(14) 0.0266(4) Uani 1 1 d U A . 
C7 C 0.3844(2) 0.12664(16) 0.46363(15) 0.0336(4) Uani 1 1 d U . . 
H7 H 0.3915 0.0843 0.4071 0.040 Uiso 1 1 calc R A . 
C8 C 0.2780(2) 0.12651(16) 0.54152(16) 0.0323(4) Uani 1 1 d U A . 
H8 H 0.2127 0.0848 0.5366 0.039 Uiso 1 1 calc R . . 
O1 O 0.5678(14) 0.3042(19) 0.550(2) 0.036(3) Uani 0.551(19) 1 d PDU A 1 
C9 C 0.5617(5) 0.3663(6) 0.6356(4) 0.0341(15) Uiso 0.551(19) 1 d PU A 1 
H9A H 0.6398 0.3998 0.6288 0.051 Uiso 0.551(19) 1 calc PR A 1 
H9B H 0.5520 0.3180 0.7058 0.051 Uiso 0.551(19) 1 calc PR A 1 
H9C H 0.4891 0.4238 0.6309 0.051 Uiso 0.551(19) 1 calc PR A 1 
O1' O 0.5544(17) 0.325(2) 0.542(3) 0.039(4) Uani 0.449(19) 1 d PDU A 2 
C9' C 0.5376(7) 0.4037(9) 0.6143(6) 0.0435(19) Uiso 0.449(19) 1 d PU A 2 
H9'1 H 0.6068 0.4490 0.5964 0.065 Uiso 0.449(19) 1 calc PR A 2 
H9'2 H 0.5379 0.3657 0.6894 0.065 Uiso 0.449(19) 1 calc PR A 2 
H9'3 H 0.4566 0.4502 0.6061 0.065 Uiso 0.449(19) 1 calc PR A 2 
C10 C 0.6054(3) 0.12533(18) 0.31642(17) 0.0461(6) Uani 1 1 d U . . 
H10A H 0.5984 0.0497 0.3516 0.069 Uiso 1 1 calc R . . 
H10B H 0.6900 0.1295 0.2764 0.069 Uiso 1 1 calc R . . 
H10C H 0.5413 0.1491 0.2659 0.069 Uiso 1 1 calc R . . 
C11 C -0.20535(16) 0.07633(14) 0.82066(13) 0.0208(3) Uani 1 1 d U . . 
C12 C -0.2893(3) 0.0642(2) 0.7378(2) 0.0526(7) Uani 1 1 d U . . 
H12A H -0.2783 -0.0123 0.7269 0.079 Uiso 1 1 calc R . . 
H12B H -0.2660 0.1109 0.6689 0.079 Uiso 1 1 calc R . . 
H12C H -0.3779 0.0861 0.7640 0.079 Uiso 1 1 calc R . . 
C13 C 0.00368(16) 0.20619(13) 1.12497(13) 0.0190(3) Uani 1 1 d U . . 
C14 C 0.07959(19) 0.24199(16) 1.20174(15) 0.0296(4) Uani 1 1 d U . . 
H14A H 0.0307 0.3041 1.2324 0.044 Uiso 1 1 calc R . . 
H14B H 0.1592 0.2640 1.1620 0.044 Uiso 1 1 calc R . . 
H14C H 0.0981 0.1812 1.2605 0.044 Uiso 1 1 calc R . . 
C21 C -0.23993(15) 0.44196(13) 0.82685(13) 0.0177(3) Uani 1 1 d DU . . 
C22 C -0.15811(16) 0.42878(14) 0.73307(14) 0.0228(3) Uani 1 1 d DU . . 
H22 H -0.1005 0.3636 0.7310 0.027 Uiso 1 1 calc R . . 
C23 C -0.16039(18) 0.51080(16) 0.64218(15) 0.0280(4) Uani 1 1 d DU . . 
H23 H -0.1037 0.5017 0.5786 0.034 Uiso 1 1 calc R . . 
C24 C -0.24471(18) 0.60504(15) 0.64429(15) 0.0276(4) Uani 1 1 d DU . . 
H24 H -0.2465 0.6605 0.5820 0.033 Uiso 1 1 calc R . . 
C25 C -0.32684(18) 0.61886(14) 0.73723(15) 0.0263(4) Uani 1 1 d DU . . 
H25 H -0.3854 0.6836 0.7383 0.032 Uiso 1 1 calc R . . 
C26 C -0.32376(17) 0.53844(14) 0.82871(14) 0.0224(3) Uani 1 1 d DU . . 
H26 H -0.3788 0.5490 0.8928 0.027 Uiso 1 1 calc R . . 
C31 C -0.23055(15) 0.40509(13) 1.05920(13) 0.0172(3) Uani 1 1 d DU . . 
C32 C -0.15518(15) 0.48879(13) 1.04902(13) 0.0196(3) Uani 1 1 d DU . . 
H32 H -0.1132 0.5153 0.9800 0.023 Uiso 1 1 calc R . . 
C33 C -0.14133(17) 0.53357(14) 1.13942(14) 0.0231(3) Uani 1 1 d DU . . 
H33 H -0.0900 0.5906 1.1319 0.028 Uiso 1 1 calc R . . 
C34 C -0.20223(18) 0.49520(15) 1.24070(15) 0.0260(4) Uani 1 1 d DU . . 
H34 H -0.1912 0.5248 1.3026 0.031 Uiso 1 1 calc R . . 
C35 C -0.27945(19) 0.41325(16) 1.25114(15) 0.0283(4) Uani 1 1 d DU . . 
H35 H -0.3224 0.3876 1.3200 0.034 Uiso 1 1 calc R . . 
C36 C -0.29355(17) 0.36899(14) 1.16071(14) 0.0238(3) Uani 1 1 d DU . . 
H36 H -0.3468 0.3134 1.1681 0.029 Uiso 1 1 calc R . . 
C41 C -0.37755(15) 0.27335(13) 0.97116(12) 0.0162(3) Uani 1 1 d DU . . 
C42 C -0.37105(15) 0.16738(13) 1.03002(13) 0.0195(3) Uani 1 1 d DU . . 
H42 H -0.2925 0.1310 1.0523 0.023 Uiso 1 1 calc R . . 
C43 C -0.47891(16) 0.11481(14) 1.05613(14) 0.0231(3) Uani 1 1 d DU . . 
H43 H -0.4737 0.0426 1.0961 0.028 Uiso 1 1 calc R . . 
C44 C -0.59395(16) 0.16702(15) 1.02423(15) 0.0248(4) Uani 1 1 d DU . . 
H44 H -0.6678 0.1313 1.0427 0.030 Uiso 1 1 calc R . . 
C45 C -0.60031(16) 0.27192(15) 0.96504(16) 0.0260(4) Uani 1 1 d DU . . 
H45 H -0.6790 0.3078 0.9427 0.031 Uiso 1 1 calc R . . 
C46 C -0.49292(16) 0.32533(14) 0.93797(14) 0.0214(3) Uani 1 1 d DU . . 
H46 H -0.4983 0.3970 0.8970 0.026 Uiso 1 1 calc R . . 
 
loop_ 
 _atom_site_aniso_label 
 _atom_site_aniso_U_11 
 _atom_site_aniso_U_22 
 _atom_site_aniso_U_33 
 _atom_site_aniso_U_23 
 _atom_site_aniso_U_13 
 _atom_site_aniso_U_12 
Pd1 0.01369(6) 0.01358(6) 0.01327(6) -0.00073(4) -0.00073(4) -0.00270(4) 
P1 0.01529(18) 0.01486(18) 0.01374(18) -0.00066(14) -0.00110(14) -0.00227(14) 
N1 0.0182(7) 0.0156(6) 0.0163(6) -0.0012(5) -0.0009(5) -0.0038(5) 
O2 0.0373(8) 0.0443(8) 0.0218(7) -0.0073(6) 0.0083(6) 0.0064(6) 
O3 0.0211(6) 0.0210(6) 0.0163(5) -0.0020(4) -0.0036(4) -0.0046(5) 
O4 0.0225(6) 0.0206(6) 0.0245(6) 0.0001(5) -0.0046(5) -0.0047(5) 
O5 0.0187(5) 0.0180(5) 0.0203(6) -0.0022(4) -0.0047(4) -0.0047(4) 
O6 0.0258(6) 0.0214(6) 0.0209(6) -0.0028(5) -0.0004(5) -0.0046(5) 
C1 0.0170(8) 0.0237(8) 0.0190(8) -0.0009(6) 0.0009(6) -0.0036(6) 
C2 0.0219(8) 0.0289(9) 0.0225(8) 0.0028(7) 0.0003(7) -0.0028(7) 
C3 0.0248(8) 0.0229(8) 0.0197(8) 0.0035(6) -0.0002(6) 0.0004(7) 
C4 0.0244(9) 0.0328(9) 0.0187(8) -0.0077(7) 0.0008(7) -0.0005(7) 
C5 0.0215(8) 0.0362(10) 0.0227(8) -0.0045(7) -0.0009(7) -0.0022(7) 
C6 0.0282(9) 0.0243(9) 0.0213(8) 0.0022(7) 0.0005(7) 0.0057(7) 
C7 0.0538(13) 0.0245(9) 0.0215(9) -0.0053(7) 0.0017(8) -0.0055(9) 
C8 0.0444(11) 0.0283(9) 0.0250(9) -0.0017(7) -0.0004(8) -0.0139(8) 
O1 0.026(3) 0.056(6) 0.029(2) -0.015(4) 0.002(3) -0.010(4) 
O1' 0.021(4) 0.061(9) 0.041(8) -0.023(6) 0.009(4) -0.013(5) 
C10 0.0683(16) 0.0325(11) 0.0248(10) -0.0016(8) 0.0156(10) 0.0108(11) 
C11 0.0198(8) 0.0248(8) 0.0189(8) -0.0045(6) -0.0017(6) -0.0054(6) 
C12 0.0761(18) 0.0508(14) 0.0420(13) 0.0093(11) -0.0371(13) -0.0360(13) 
C13 0.0208(8) 0.0157(7) 0.0209(8) -0.0056(6) -0.0050(6) 0.0019(6) 
C14 0.0334(10) 0.0326(10) 0.0264(9) -0.0082(8) -0.0111(8) -0.0044(8) 
C21 0.0187(7) 0.0167(7) 0.0176(7) 0.0004(6) -0.0038(6) -0.0046(6) 
C22 0.0217(8) 0.0231(8) 0.0205(8) 0.0024(7) -0.0001(6) -0.0027(6) 
C23 0.0267(9) 0.0332(10) 0.0203(8) 0.0045(7) 0.0014(7) -0.0062(8) 
C24 0.0311(9) 0.0263(9) 0.0237(9) 0.0088(7) -0.0093(7) -0.0084(7) 
C25 0.0299(9) 0.0192(8) 0.0291(9) 0.0010(7) -0.0096(7) -0.0008(7) 
C26 0.0259(9) 0.0194(8) 0.0214(8) -0.0017(6) -0.0038(7) -0.0022(7) 
C31 0.0169(7) 0.0159(7) 0.0178(7) -0.0025(6) -0.0022(6) 0.0005(6) 
C32 0.0200(8) 0.0194(8) 0.0184(8) -0.0016(6) -0.0009(6) -0.0027(6) 
C33 0.0250(8) 0.0194(8) 0.0263(9) -0.0051(7) -0.0049(7) -0.0042(7) 
C34 0.0311(9) 0.0261(9) 0.0228(8) -0.0100(7) -0.0057(7) -0.0010(7) 
C35 0.0346(10) 0.0317(10) 0.0184(8) -0.0048(7) 0.0035(7) -0.0084(8) 
C36 0.0269(9) 0.0241(8) 0.0207(8) -0.0030(7) 0.0019(7) -0.0089(7) 
C41 0.0160(7) 0.0173(7) 0.0156(7) -0.0039(6) 0.0004(6) -0.0032(6) 
C42 0.0174(7) 0.0201(8) 0.0198(8) -0.0007(6) -0.0017(6) -0.0023(6) 
C43 0.0240(8) 0.0216(8) 0.0233(8) -0.0018(7) 0.0015(7) -0.0069(7) 
C44 0.0185(8) 0.0304(9) 0.0287(9) -0.0119(7) 0.0017(7) -0.0084(7) 
C45 0.0177(8) 0.0280(9) 0.0345(10) -0.0110(8) -0.0068(7) 0.0005(7) 
C46 0.0210(8) 0.0200(8) 0.0238(8) -0.0045(6) -0.0047(6) -0.0008(6) 
 
_geom_special_details 
; 
 All esds (except the esd in the dihedral angle between two l.s. planes) 
 are estimated using the full covariance matrix.  The cell esds are taken 
 into account individually in the estimation of esds in distances, angles 
 and torsion angles; correlations between esds in cell parameters are only 
 used when they are defined by crystal symmetry.  An approximate (isotropic) 
 treatment of cell esds is used for estimating esds involving l.s. planes. 
; 
 
loop_ 
 _geom_bond_atom_site_label_1 
 _geom_bond_atom_site_label_2 
 _geom_bond_distance 
 _geom_bond_site_symmetry_2 
 _geom_bond_publ_flag 
Pd1 O5 2.0042(11) . ? 
Pd1 O3 2.0234(11) . ? 
Pd1 N1 2.1000(14) . ? 
Pd1 P1 2.2539(4) . ? 
P1 C21 1.8158(16) . ? 
P1 C41 1.8197(16) . ? 
P1 C31 1.8221(16) . ? 
N1 C1 1.480(2) . ? 
O2 C6 1.367(2) . ? 
O2 C10 1.427(3) . ? 
O3 C11 1.295(2) . ? 
O4 C11 1.228(2) . ? 
O5 C13 1.295(2) . ? 
O6 C13 1.236(2) . ? 
C1 C2 1.521(2) . ? 
C2 C3 1.513(2) . ? 
C3 C8 1.382(3) . ? 
C3 C4 1.392(3) . ? 
C4 C5 1.393(2) . ? 
C5 O1 1.346(12) . ? 
C5 O1' 1.385(15) . ? 
C5 C6 1.401(3) . ? 
C6 C7 1.380(3) . ? 
C7 C8 1.400(3) . ? 
O1 C9 1.43(3) . ? 
O1' C9' 1.43(4) . ? 
C11 C12 1.510(2) . ? 
C13 C14 1.511(2) . ? 
C21 C22 1.392(2) . ? 
C21 C26 1.397(2) . ? 
C22 C23 1.394(2) . ? 
C23 C24 1.379(3) . ? 
C24 C25 1.387(3) . ? 
C25 C26 1.388(2) . ? 
C31 C36 1.394(2) . ? 
C31 C32 1.396(2) . ? 
C32 C33 1.391(2) . ? 
C33 C34 1.389(3) . ? 
C34 C35 1.391(3) . ? 
C35 C36 1.388(2) . ? 
C41 C46 1.393(2) . ? 
C41 C42 1.396(2) . ? 
C42 C43 1.389(2) . ? 
C43 C44 1.385(2) . ? 
C44 C45 1.386(3) . ? 
C45 C46 1.391(2) . ? 
 
loop_ 
 _geom_angle_atom_site_label_1 
 _geom_angle_atom_site_label_2 
 _geom_angle_atom_site_label_3 
 _geom_angle 
 _geom_angle_site_symmetry_1 
 _geom_angle_site_symmetry_3 
 _geom_angle_publ_flag 
O5 Pd1 O3 174.97(4) . . ? 
O5 Pd1 N1 87.89(5) . . ? 
O3 Pd1 N1 92.77(5) . . ? 
O5 Pd1 P1 93.24(3) . . ? 
O3 Pd1 P1 86.20(4) . . ? 
N1 Pd1 P1 178.49(4) . . ? 
C21 P1 C41 109.03(7) . . ? 
C21 P1 C31 105.33(7) . . ? 
C41 P1 C31 105.14(7) . . ? 
C21 P1 Pd1 111.73(6) . . ? 
C41 P1 Pd1 109.04(5) . . ? 
C31 P1 Pd1 116.19(5) . . ? 
C1 N1 Pd1 116.39(10) . . ? 
C6 O2 C10 116.87(18) . . ? 
C11 O3 Pd1 117.39(10) . . ? 
C13 O5 Pd1 115.22(10) . . ? 
N1 C1 C2 112.01(13) . . ? 
C3 C2 C1 112.36(14) . . ? 
C8 C3 C4 118.82(17) . . ? 
C8 C3 C2 120.17(17) . . ? 
C4 C3 C2 120.96(16) . . ? 
C3 C4 C5 120.84(17) . . ? 
O1 C5 O1' 12(2) . . ? 
O1 C5 C4 126.7(12) . . ? 
O1' C5 C4 123.4(14) . . ? 
O1 C5 C6 113.3(12) . . ? 
O1' C5 C6 116.5(15) . . ? 
C4 C5 C6 119.73(18) . . ? 
O2 C6 C7 124.79(18) . . ? 
O2 C6 C5 115.60(17) . . ? 
C7 C6 C5 119.59(17) . . ? 
C6 C7 C8 119.98(18) . . ? 
C3 C8 C7 120.98(18) . . ? 
C5 O1 C9 115.2(15) . . ? 
C5 O1' C9' 119.8(18) . . ? 
O4 C11 O3 125.66(15) . . ? 
O4 C11 C12 120.43(16) . . ? 
O3 C11 C12 113.89(15) . . ? 
O6 C13 O5 124.81(15) . . ? 
O6 C13 C14 121.62(16) . . ? 
O5 C13 C14 113.56(15) . . ? 
C22 C21 C26 119.15(15) . . ? 
C22 C21 P1 118.82(12) . . ? 
C26 C21 P1 122.00(13) . . ? 
C21 C22 C23 120.26(16) . . ? 
C24 C23 C22 120.14(17) . . ? 
C23 C24 C25 120.05(16) . . ? 
C24 C25 C26 120.19(17) . . ? 
C25 C26 C21 120.18(16) . . ? 
C36 C31 C32 118.94(15) . . ? 
C36 C31 P1 120.96(13) . . ? 
C32 C31 P1 119.73(12) . . ? 
C33 C32 C31 120.30(15) . . ? 
C34 C33 C32 120.26(16) . . ? 
C33 C34 C35 119.78(16) . . ? 
C36 C35 C34 119.84(17) . . ? 
C35 C36 C31 120.84(16) . . ? 
C46 C41 C42 119.32(15) . . ? 
C46 C41 P1 124.46(12) . . ? 
C42 C41 P1 116.22(12) . . ? 
C43 C42 C41 120.29(15) . . ? 
C44 C43 C42 120.38(16) . . ? 
C43 C44 C45 119.38(16) . . ? 
C44 C45 C46 120.83(16) . . ? 
C45 C46 C41 119.80(16) . . ? 
 
loop_ 
 _geom_hbond_atom_site_label_D 
 _geom_hbond_atom_site_label_H 
 _geom_hbond_atom_site_label_A 
 _geom_hbond_distance_DH 
 _geom_hbond_distance_HA 
 _geom_hbond_distance_DA 
 _geom_hbond_angle_DHA 
 _geom_hbond_site_symmetry_A 
N1 H01B O6  0.810(16) 2.257(17) 2.9902(19) 150.8(18) 2_557 
N1 H01A O4  0.815(16) 2.127(16) 2.9375(18) 173.5(19) 2_557 
C44 H44 O4  0.95 2.42 3.341(2) 164.2 2_457 
 
_diffrn_measured_fraction_theta_max    0.910 
_diffrn_reflns_theta_full              27.00 
_diffrn_measured_fraction_theta_full   0.993 
_refine_diff_density_max    0.490 
_refine_diff_density_min   -0.382 
_refine_diff_density_rms    0.065 


#===END
